# Supplementary material for: Polydentate hydrazones as multitasking catalysts in visible-light-induced coupling reactions of amines
Source: Royal Society of Chemistry journal article supplement (doi:10.1039/d2ob02092k), 2022-12-15

# Supporting information

## Polydentate hydrazones as multitasking catalysts in visible-light-induced coupling reactions of amines

Ganghu Wang,<sup>a</sup> Jianhua Zhang,<sup>b</sup> Legen Hu,<sup>a</sup> Jiaquan Wang<sup>a</sup> and Chunyin Zhu<sup>\*a</sup>

---

<sup>a</sup> School of Chemistry and Chemical Engineering, Jiangsu University, Zhenjiang 212013, PR China. E-mail: zhucycn@gmail.com (C. Zhu)

<sup>b</sup> N.O.D topia (Guangzhou) Biotechnology Co. Ltd., Guangzhou, Guangdong 510599, PR China.

### List of contents

|                                                                           |      |
|---------------------------------------------------------------------------|------|
| 1.General Information .....                                               | 2    |
| 2.General procedure for synthesis of L <sub>1</sub> -L <sub>3</sub> ..... | 2    |
| 3.General procedure for synthesis of 3aa-3aj,3ba-3ka,4a-4k.....           | 2-3  |
| 5.Spectroscopic Data for Products.....                                    | 5-34 |

## 1. General Information

Column chromatography was generally performed on silica gel (200-300 mesh) and reactions were monitored by thin layer chromatography (TLC) using UV light to visualize the course of the reactions. The  $^1\text{H}$  (400MHz) and  $^{13}\text{C}$  NMR (100MHz) data were recorded on Bruker AVANCE II 400MHz spectrometer using  $\text{CDCl}_3$  as solvent. The chemical shifts ( $\delta$ ) are reported in ppm and coupling constants (J) in Hz.  $^1\text{H}$  NMR spectra was recorded with tetramethylsilane ( $\delta = 0.00$  ppm) as internal reference;  $^{13}\text{C}$  NMR spectra was recorded with  $\text{CDCl}_3$  ( $\delta = 77.00$  ppm) as internal reference.

## 2. General procedure for synthesis of $\text{L}_1$ - $\text{L}_3$

Preparation of  $\text{L}_1$ : To a 100ml oven-dried flask was added hydrazine hydrate (6.53mL) and 2-fluoropyridine (0.99mL), and heated to  $120^\circ\text{C}$  to reflux. When the reaction was completed, it was diluted with water and extracted with anhydrous ether 3 times. The organic phase was concentrated using the rotary evaporator. Then the flask was added absolute ethanol (20mL) and picolinaldehyde (1.13mL). The reaction mixture was stirred at  $90^\circ\text{C}$  to reflux. When the reaction was completed, removal of solvent followed by column chromatography afforded yellow solid 1.72g, yield 78%.

Preparation of  $\text{L}_2$ : To a 100 ml ventilated flask was added dodecanohydrazide (2.14 g), absolute ethanol (20 mL) and indoline-2,3-dione (1.32 g). The reaction mixture was stirred to reflux at  $90^\circ\text{C}$ . When the reaction was completed, suction filtration to obtain 2.74 g of orange solid with a yield of 80%.

Preparation of  $\text{L}_3$ : To a 100 mL oven dry flask was added ethanol (20 mL), hydrazine hydrate (6.53 mL) and 2-pyridinecarbaldehyde (1.13 mL). The reaction mixture was stirred at  $90^\circ\text{C}$  to reflux. When the reaction was completed, the solvent was removed using a rotary evaporator, deionized water was added and extracted three times with anhydrous ether to remove excess hydrazine hydrate in the system, and the organic phases were combined and the solvent was concentrated. Then add ethanol (20mL) and isatin (1.32g) to the flask again, wait for the reaction to end, and filter the obtained orange-red solid 2.20g with suction.

## 3. General procedure for synthesis of $3\text{aa}$ - $3\text{aj}$ and $3\text{ba}$ - $3\text{ka}$ , $4\text{a}$ - $4\text{k}$

A dry 25 mL reaction tube was charged with arylboronic acid (2.5 mmol), arylamine (1.0 mmol), hydrazone ligand  $\text{L}_1$  (0.1 mmol),  $\text{CuCl}_2 \cdot 2\text{H}_2\text{O}$  (0.05 mmol), DBU (1.2 mmol) and DMF (2 mL). The reaction mixture was stirred at room temperature under blue LED illumination. The reaction was followed by thin layer chromatography (TLC). When the reaction was complete, the whole was transferred to a separatory funnel, deionized water was added, extracted three times with ethyl acetate, and the organic phases were combined and dried over anhydrous sodium sulfate. Concentration using a rotary evaporator to remove the solvent followed by column chromatography gave the desired product for  $3\text{aa}$ - $3\text{aj}$  and  $3\text{ba}$ - $3\text{ka}$ .

In a dry test tube, add 1.5 mmol of aniline compound, 1.2 mmol of <sup>t</sup>BuOK, 0.1 mmol of L<sub>3</sub>, 0.05 mmol of copper chloride dihydrate and 2 ml of DMSO. The reaction mixture was stirred at room temperature under the irradiation of blue LED. The reaction was monitored by thin layer chromatography (TLC). When the reaction was completed, the solvent was concentrated using the rotary evaporator. Removal of solvent followed by column chromatography afforded desired products for **4a-4k**.

## 4. spectroscopic data for products

The  $^1\text{H-NMR}$  spectrum of 3aa

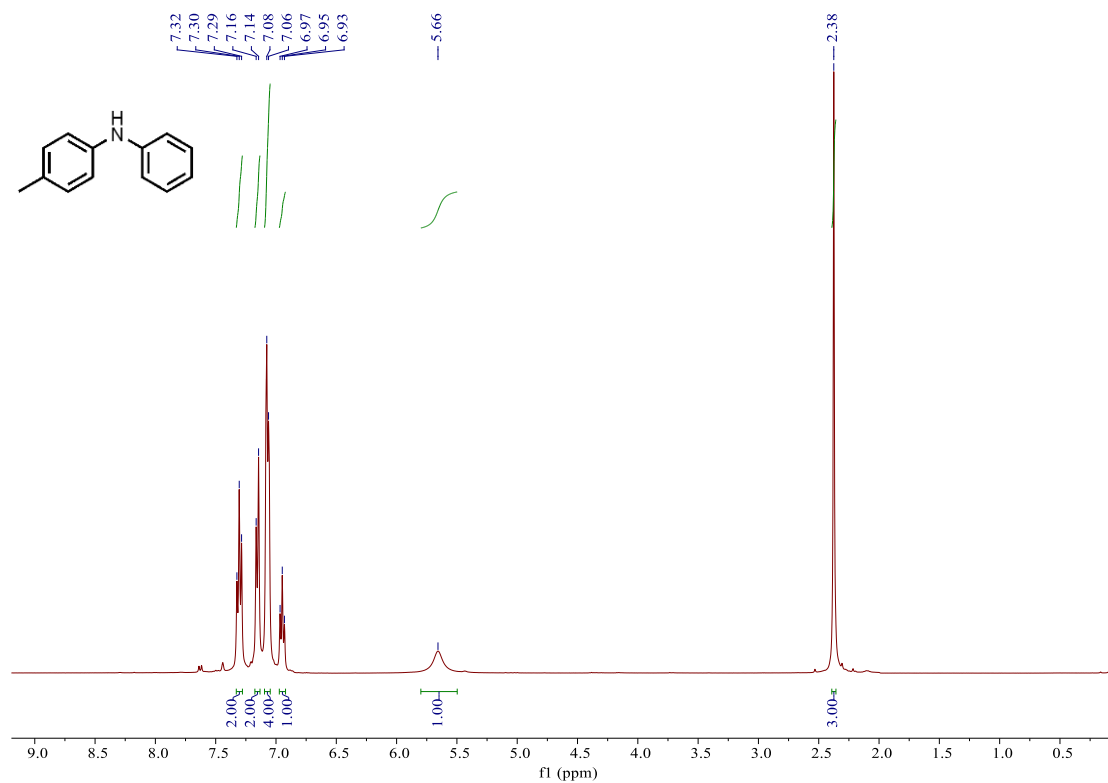

The  $^{13}\text{C-NMR}$  spectrum of 3aa

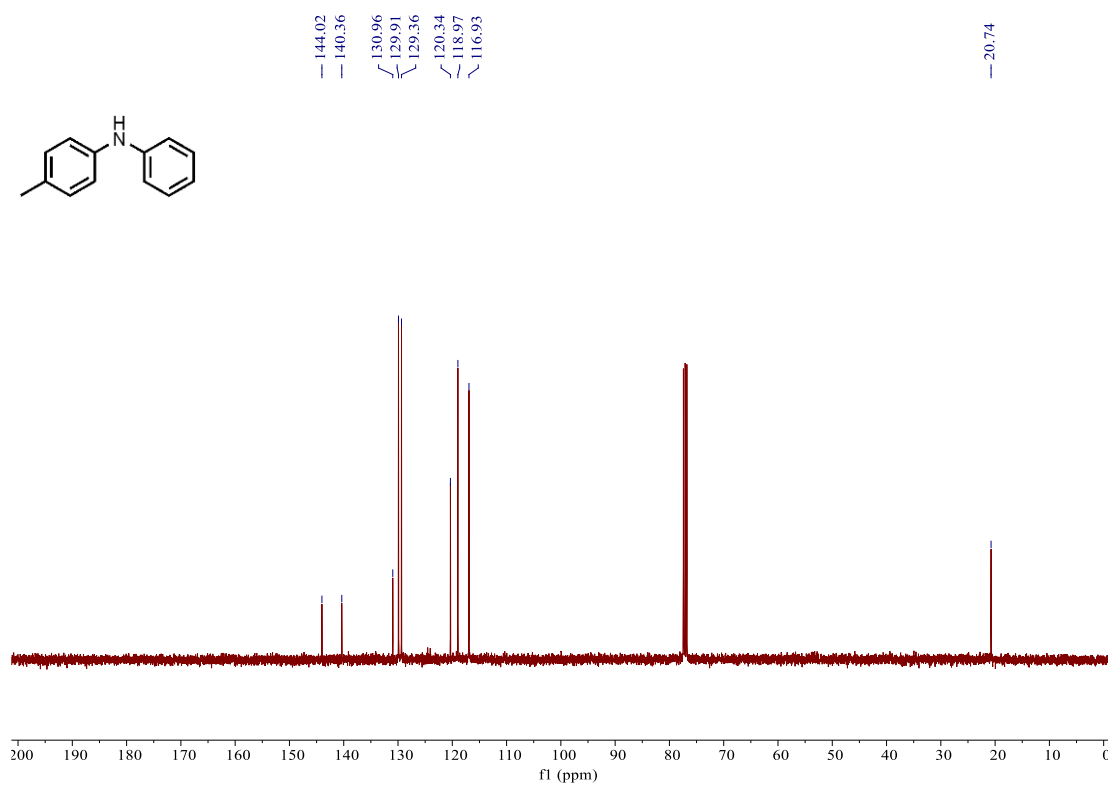

The  $^1\text{H}$ -NMR spectrum of 3ab

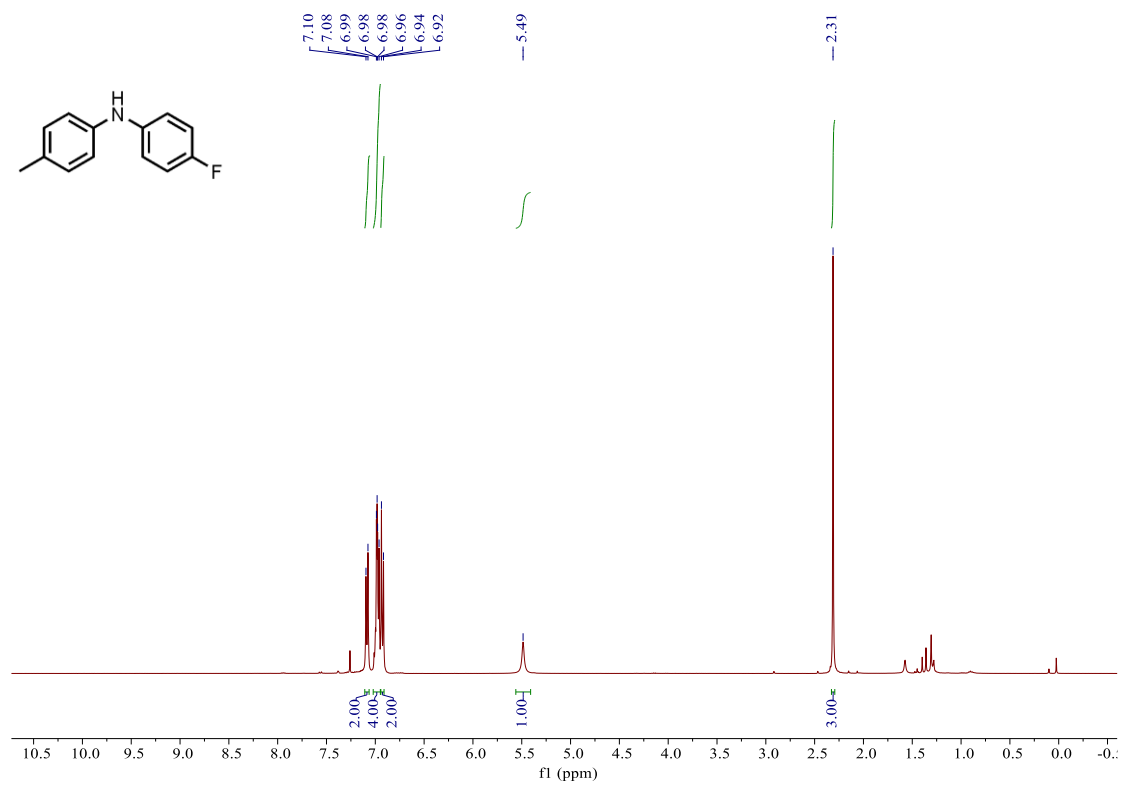

The  $^{13}\text{C}$ -NMR spectrum of 3ab

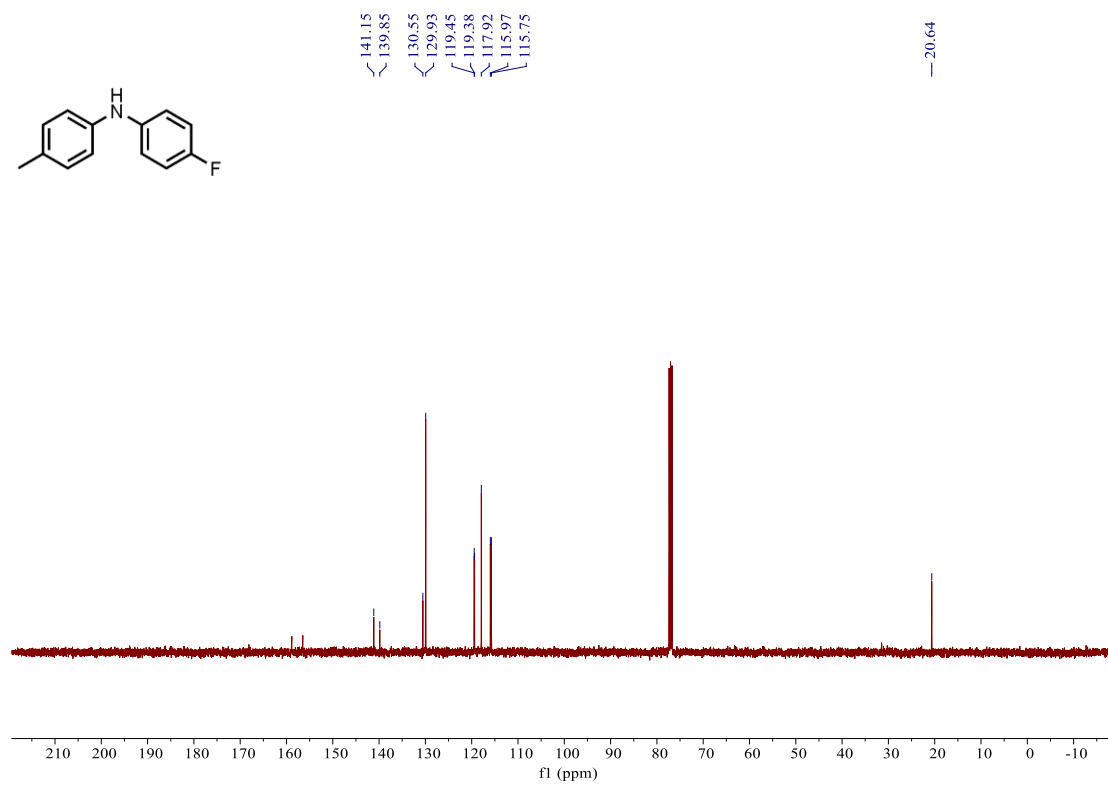

### The $^{19}\text{F}$ -NMR spectrum of 3ab

Desktop/3ab 氟谱  
20221208-1-F

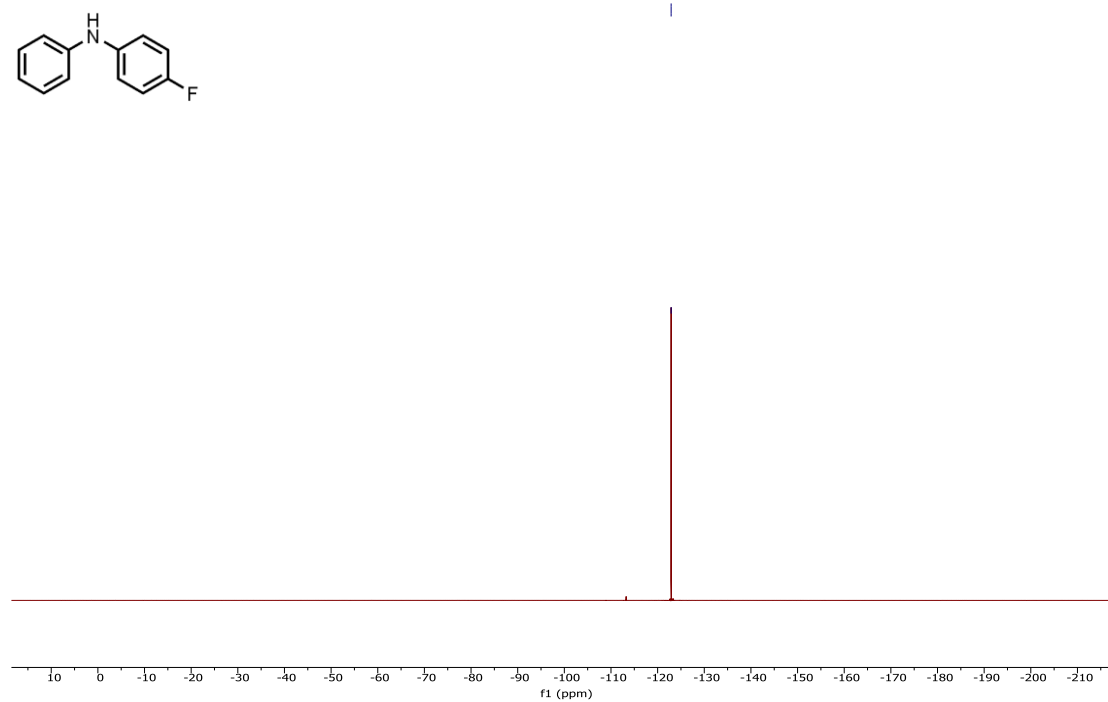

### The $^1\text{H}$ -NMR spectrum of 3ac

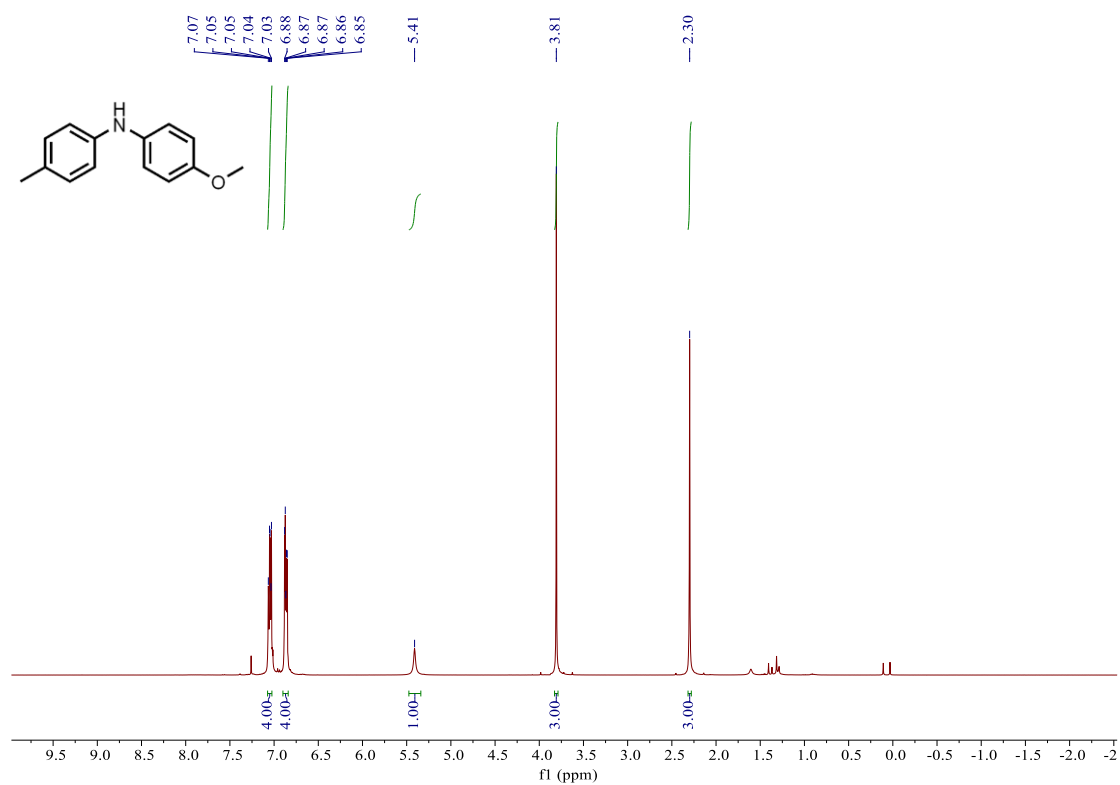

The  $^{13}\text{C}$ -NMR spectrum of 3ac

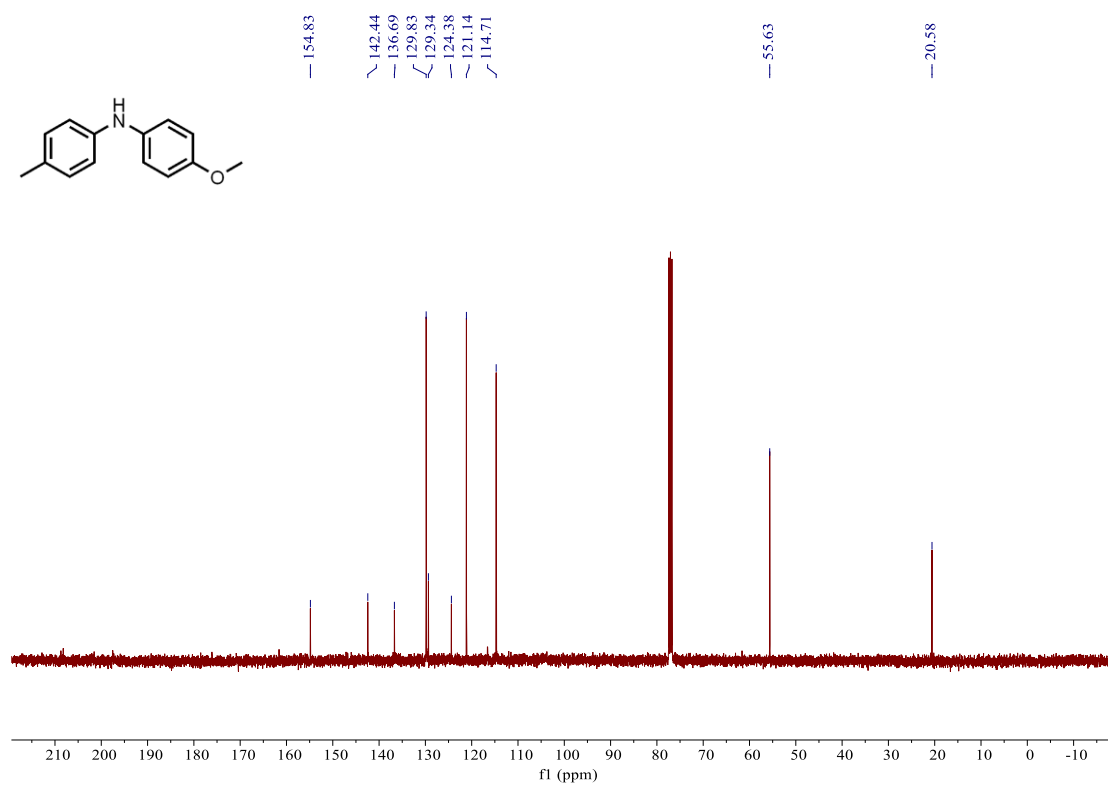

The  $^1\text{H}$ -NMR spectrum of 3ad

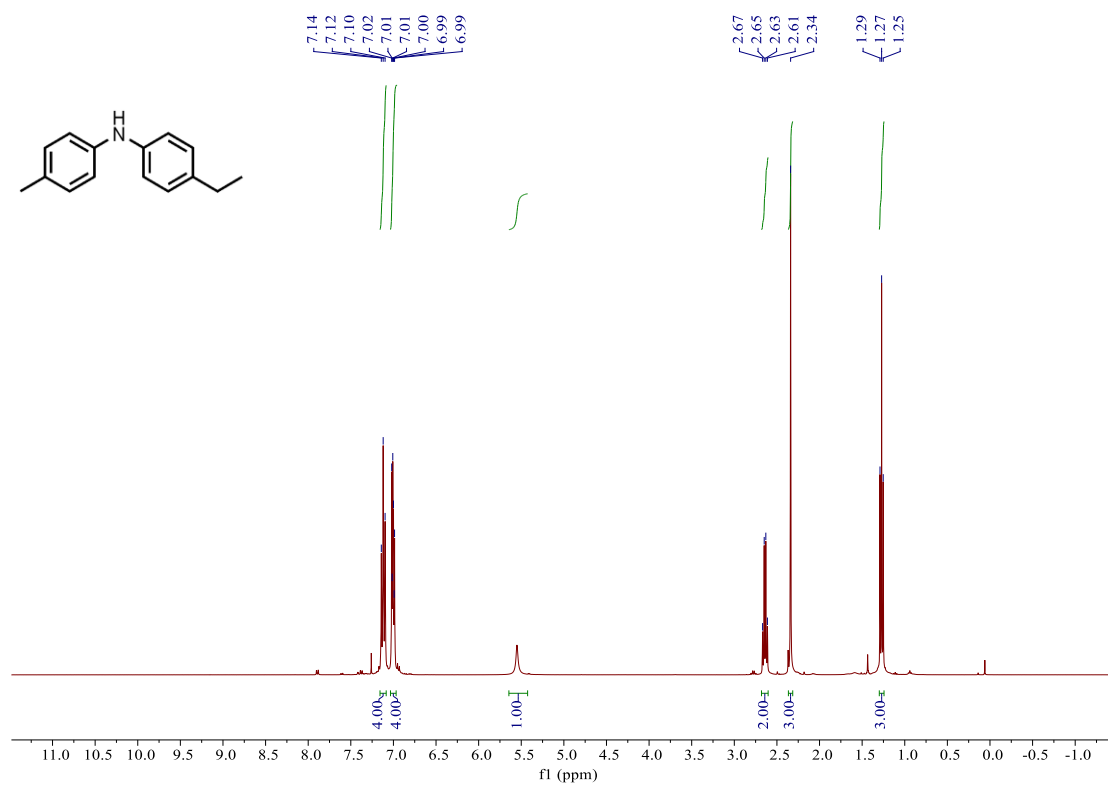

The  $^{13}\text{C}$ -NMR spectrum of 3ad

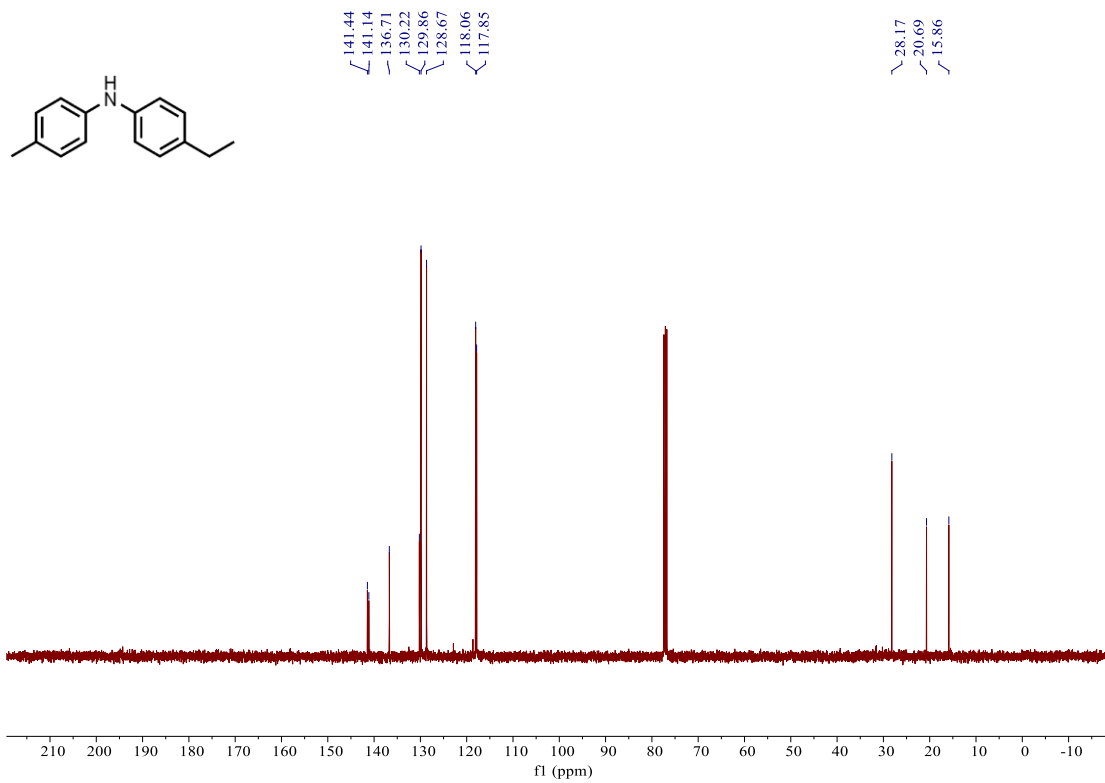

The <sup>1</sup>H-NMR spectrum of 3ae

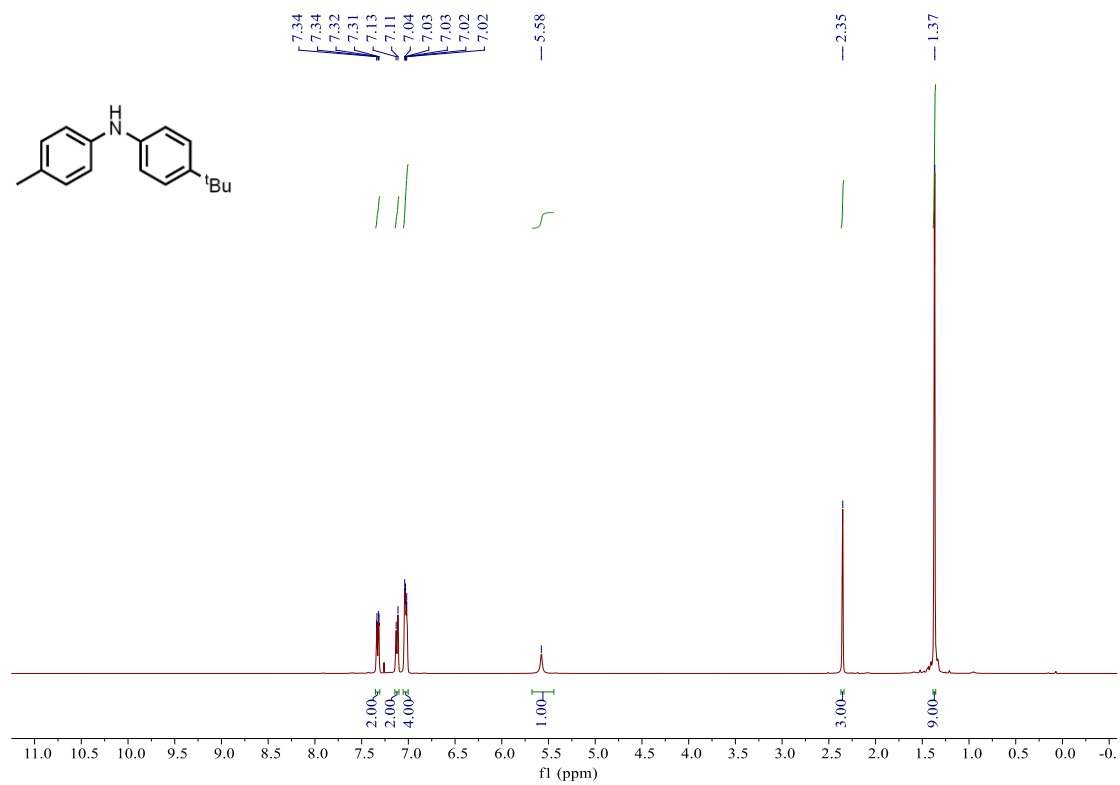



The  $^{13}\text{C}$ -NMR spectrum of 3ae

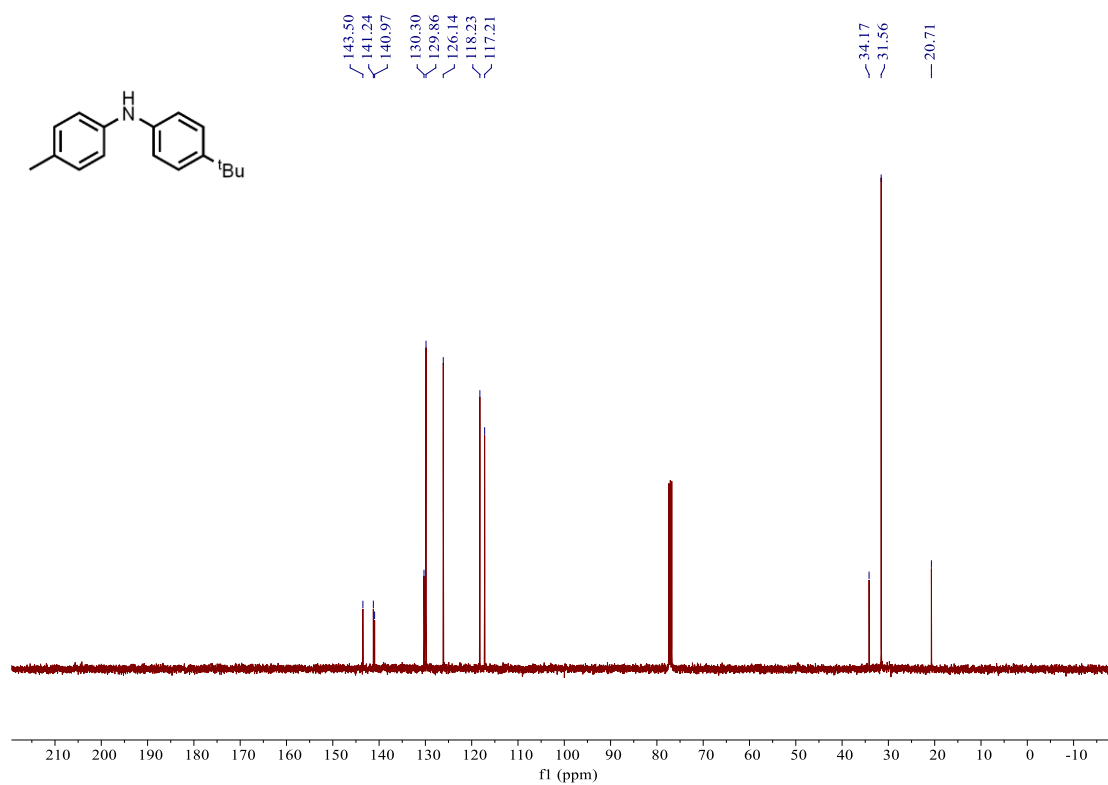

The  $^1\text{H}$ -NMR spectrum of 3af

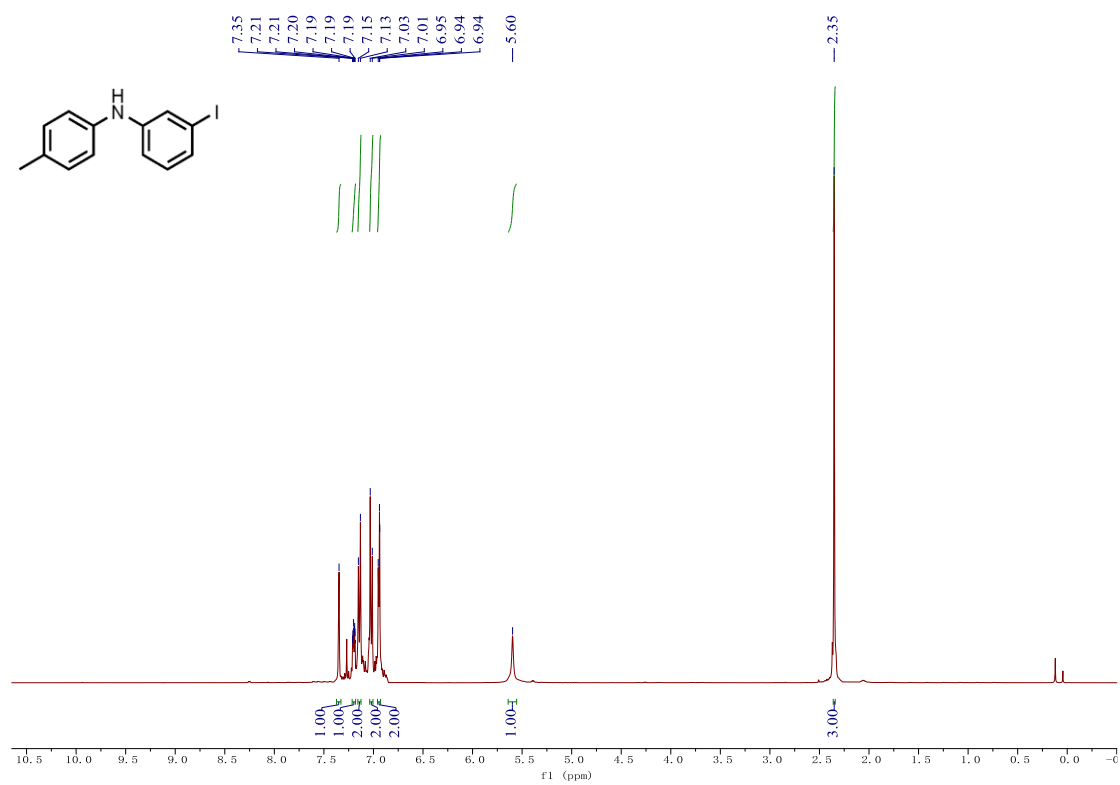

The  $^{13}\text{C}$ -NMR spectrum of 3af

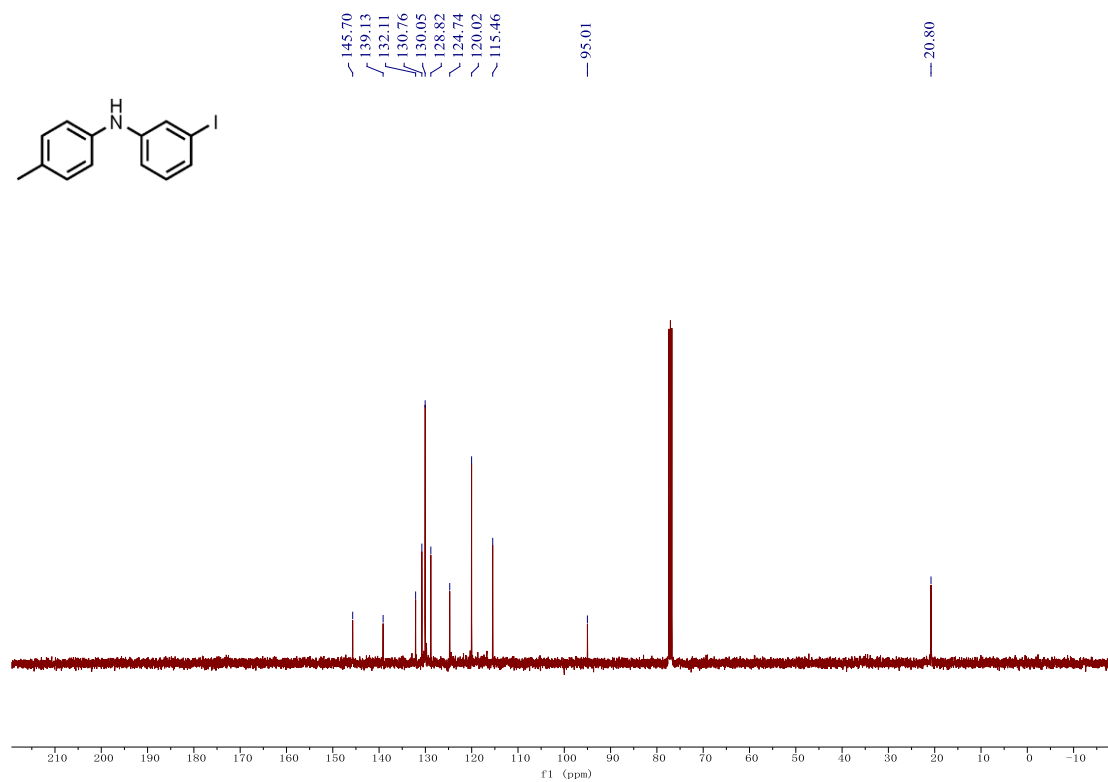

The  $^1\text{H}$ -NMR spectrum of 3ag

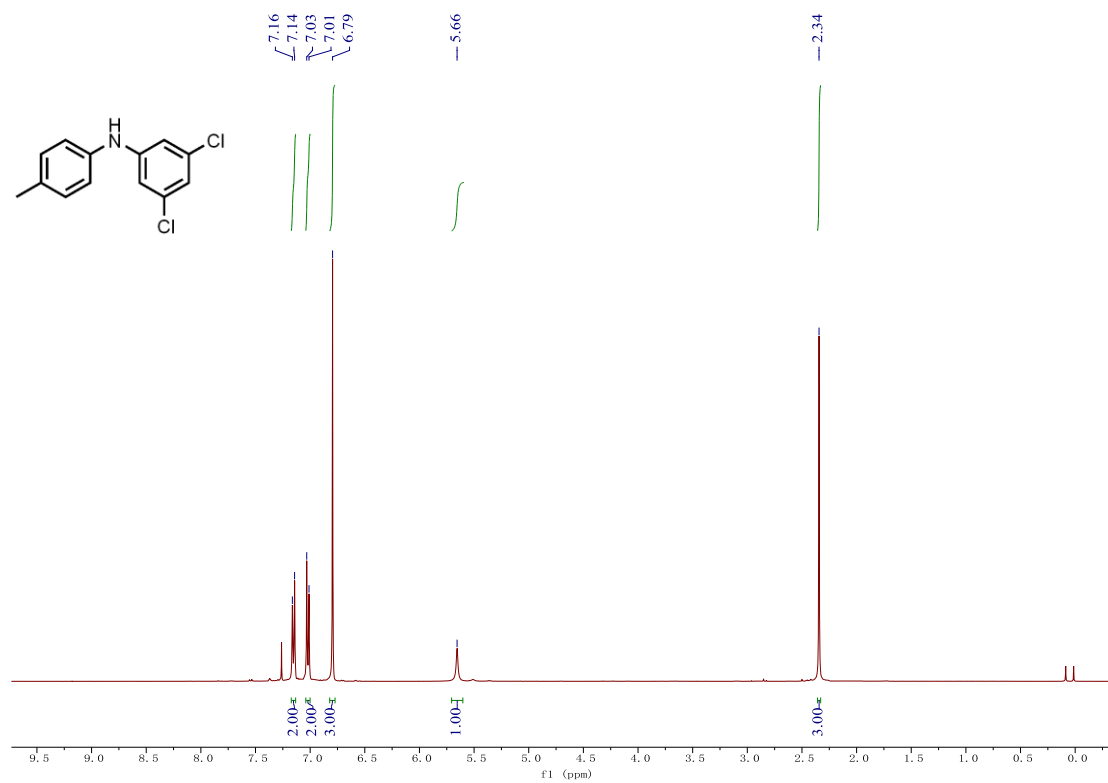

The  $^{13}\text{C}$ -NMR spectrum of 3ag

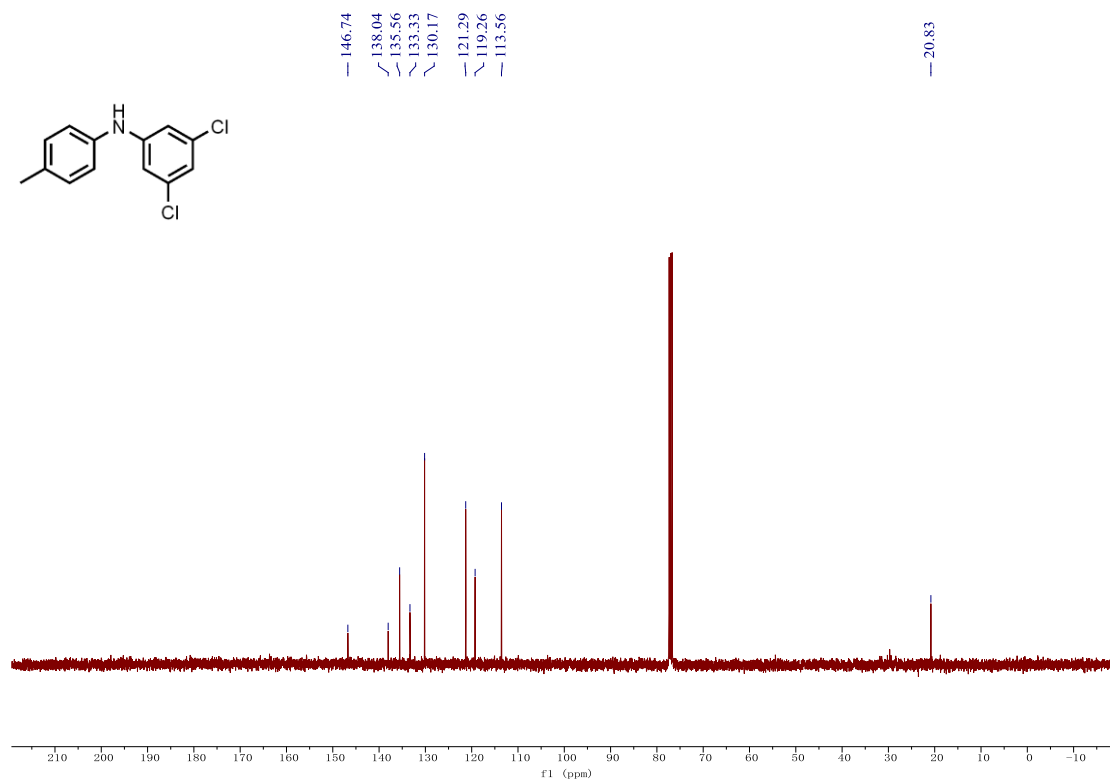

The  $^1\text{H}$ -NMR spectrum of 3ah

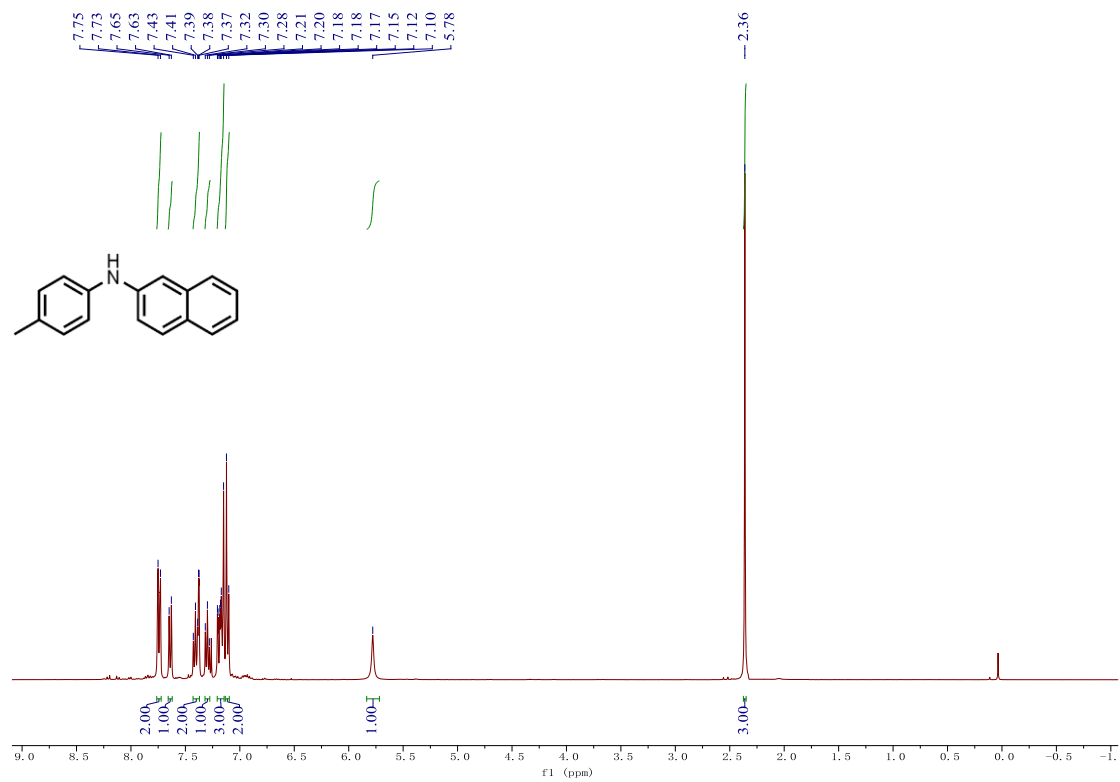

The  $^{13}\text{C}$ -NMR spectrum of 3ah

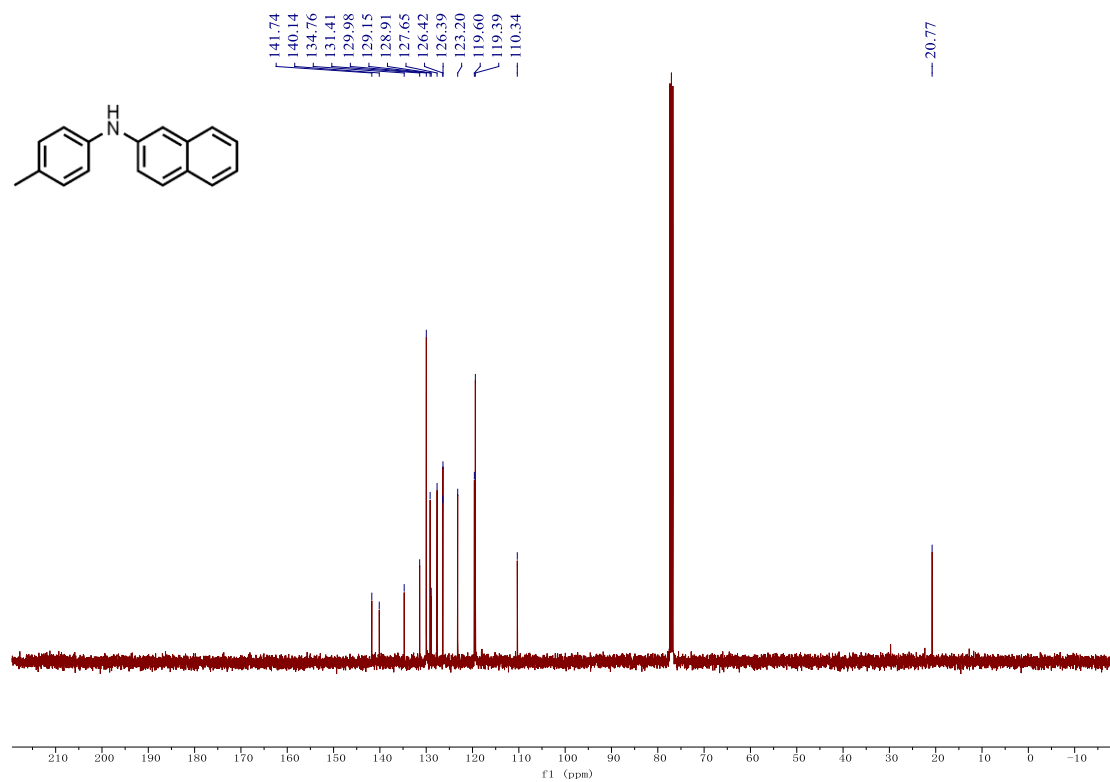

The  $^1\text{H}$ -NMR spectrum of 3ai

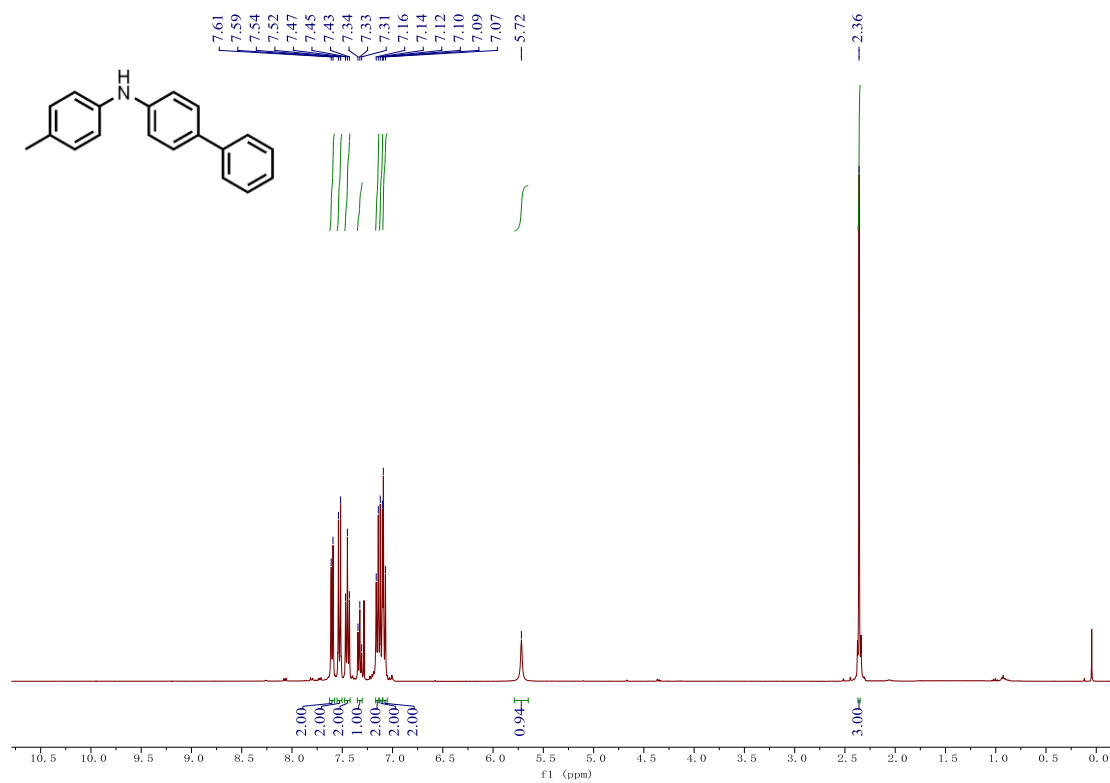

The  $^{13}\text{C}$ -NMR spectrum of 3ai

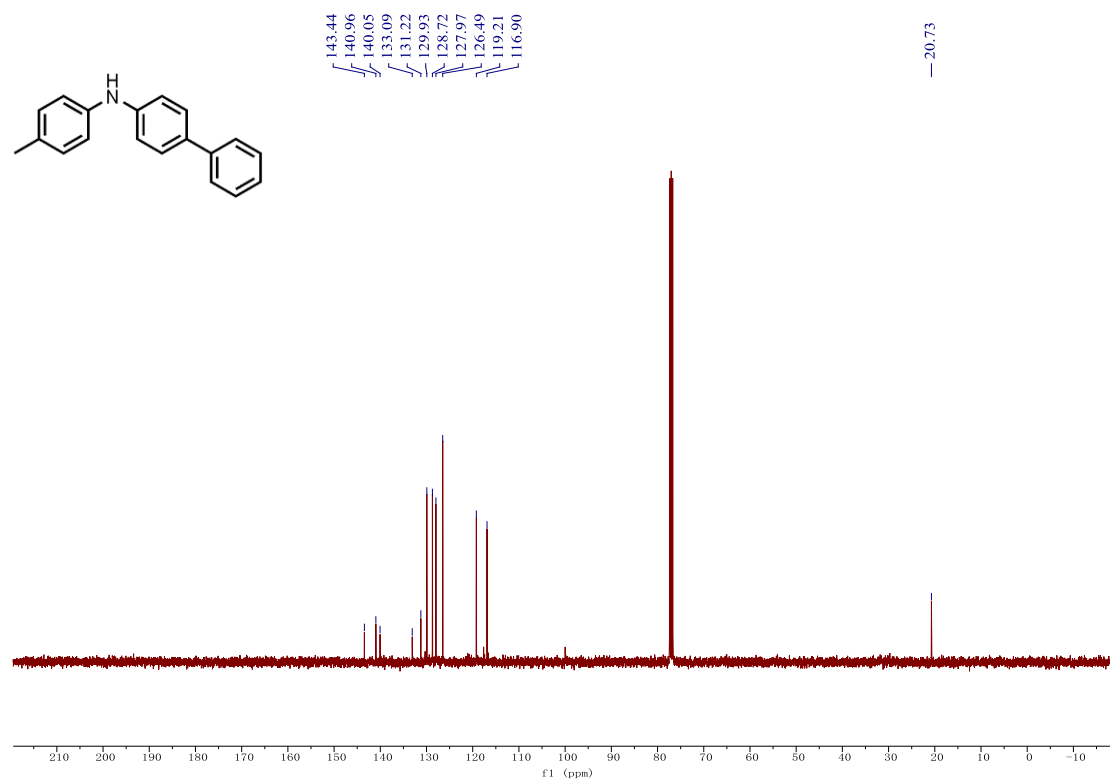

The  $^1\text{H}$ -NMR spectrum of 3ba

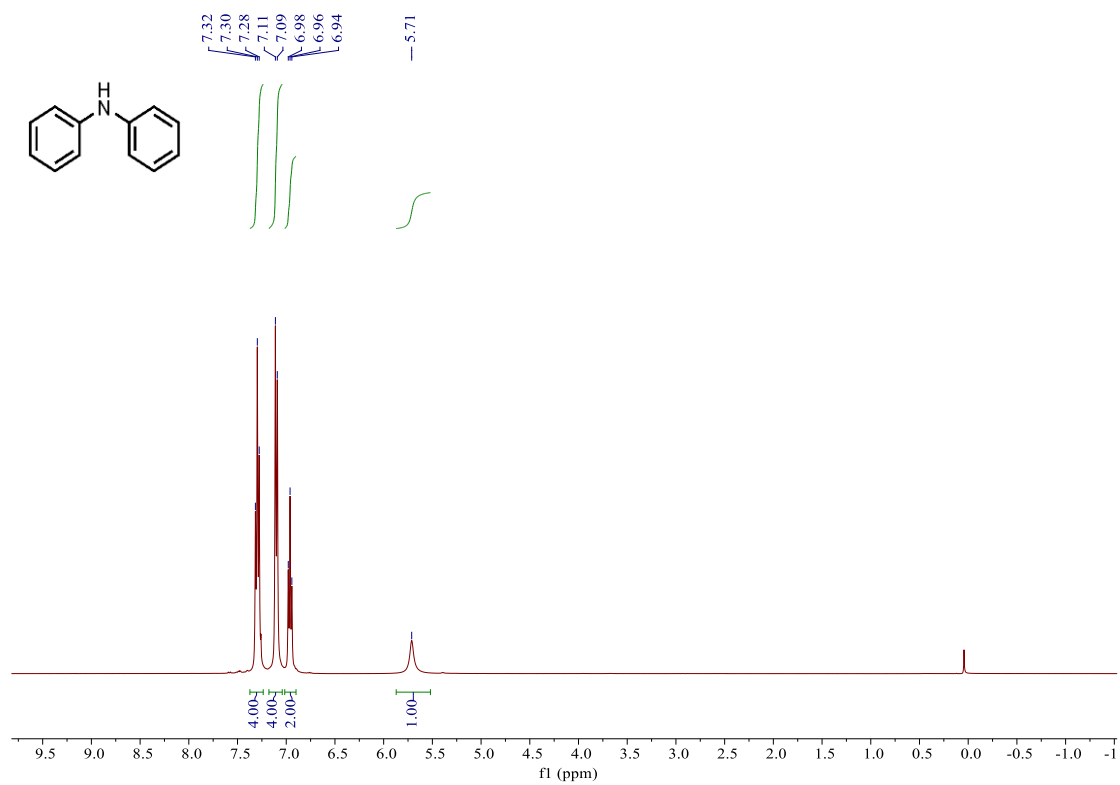

The  $^{13}\text{C}$ -NMR spectrum of 3ba

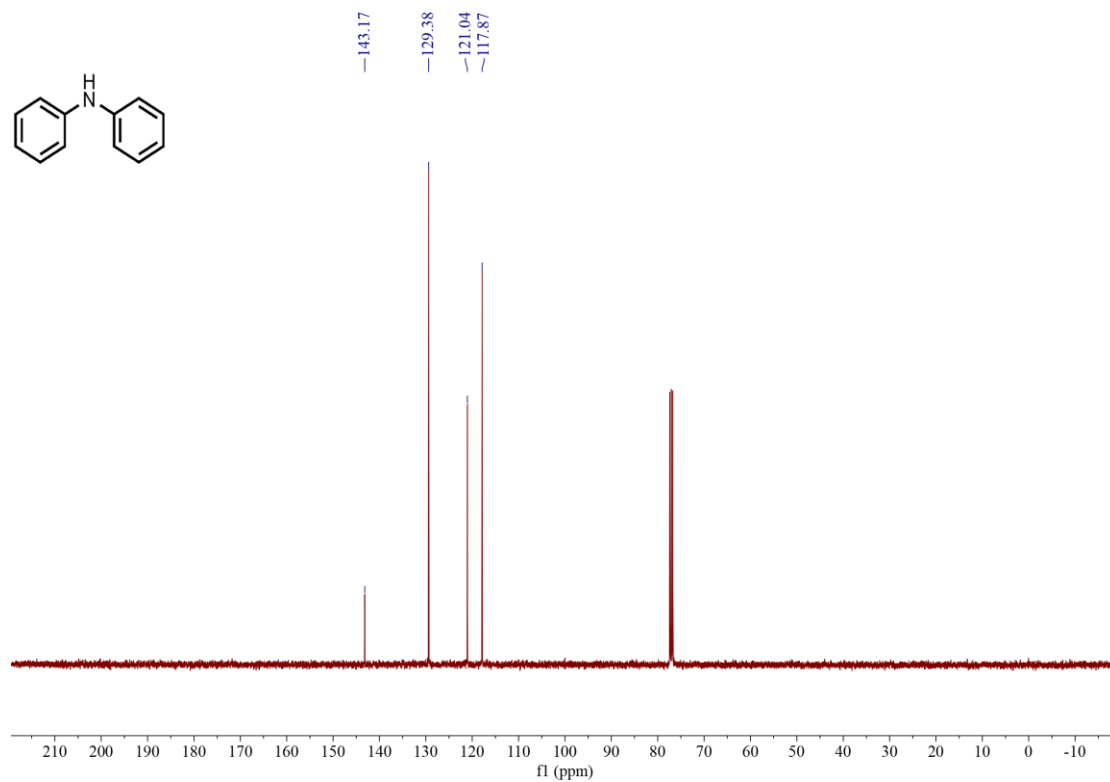

The  $^1\text{H}$ -NMR spectrum of 3ca

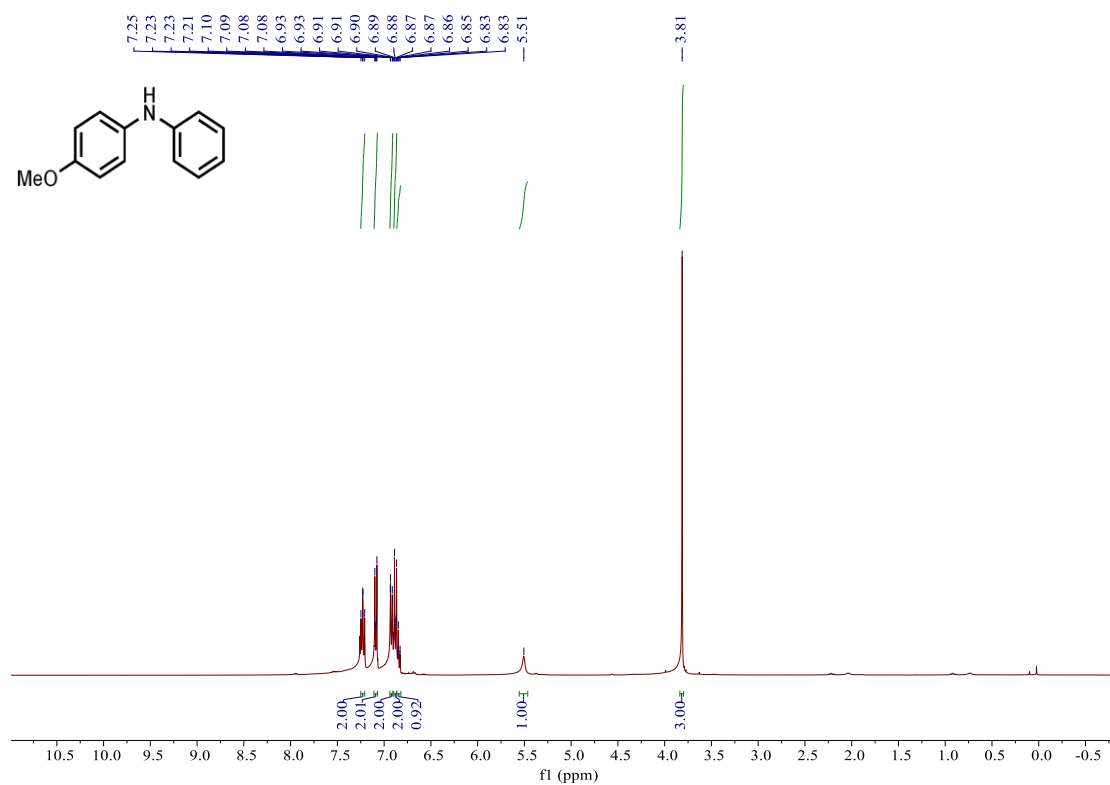

The  $^{13}\text{C}$ -NMR spectrum of 3ca

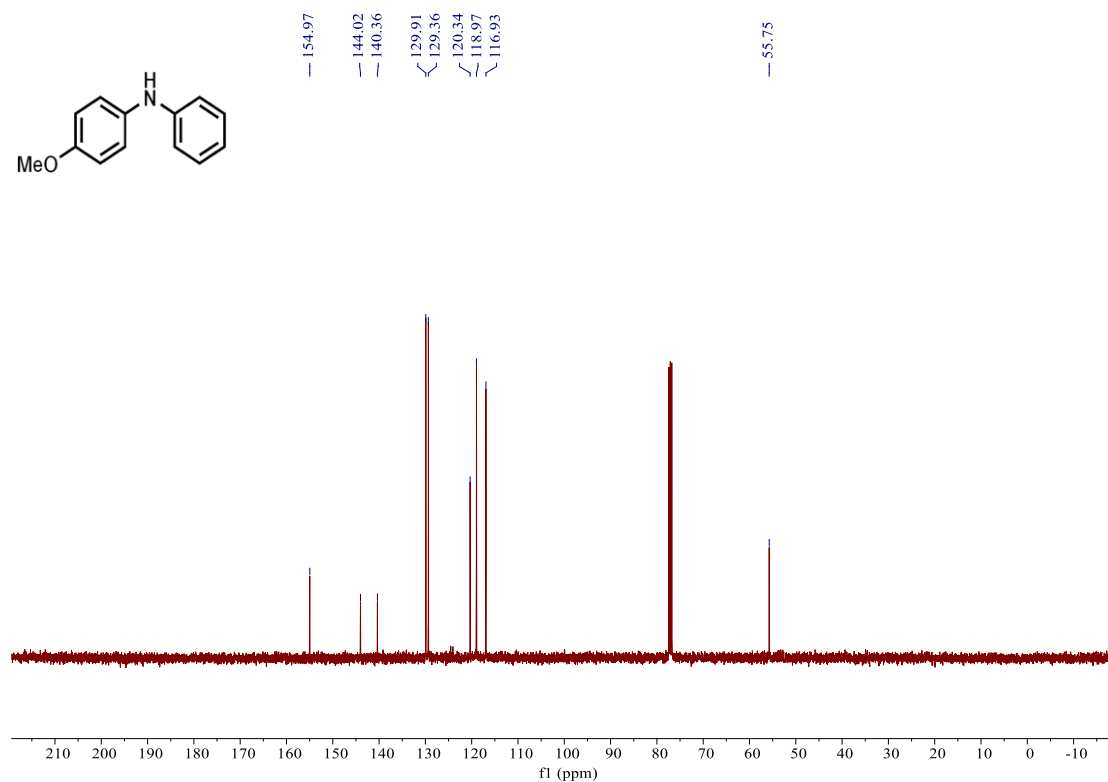

The  $^1\text{H}$ -NMR spectrum of 3da

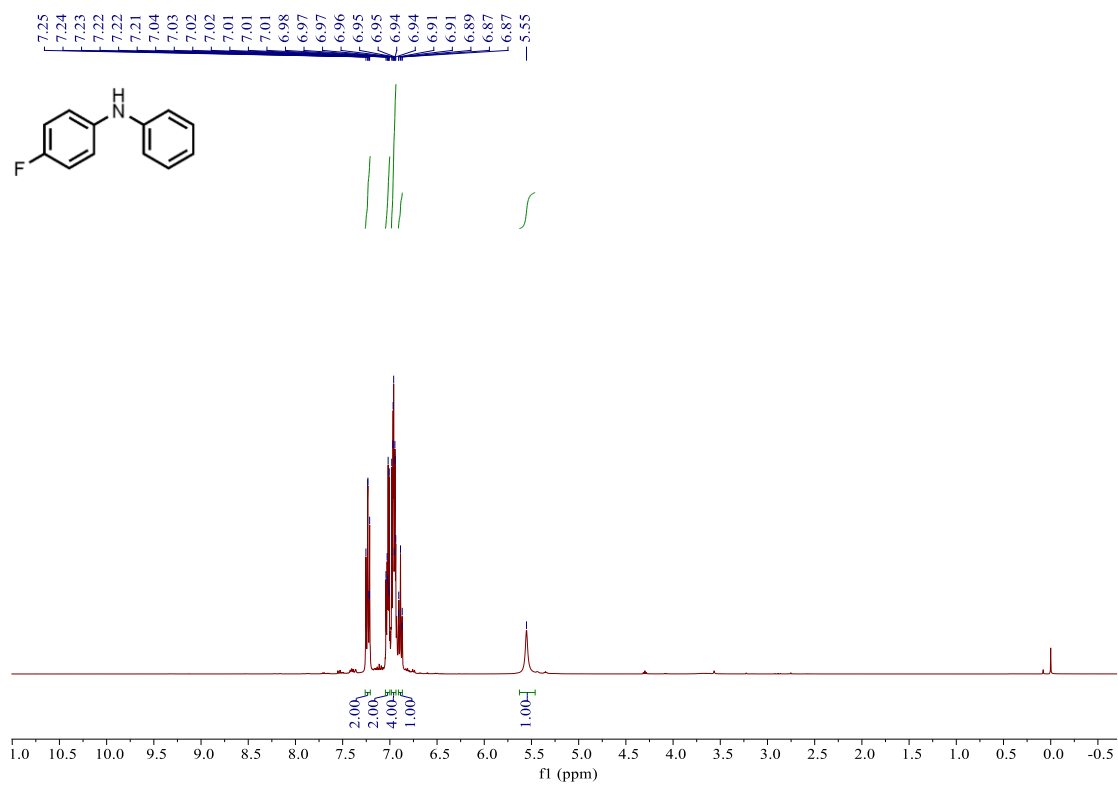

### The $^{13}\text{C}$ -NMR spectrum of 3da

Desktop/3da碳谱  
20221208-2-C

159.099  
156.714  
143.835  
138.866  
138.843  
129.316  
120.495  
120.469  
120.391  
116.710  
115.910  
115.687

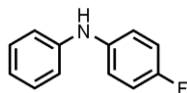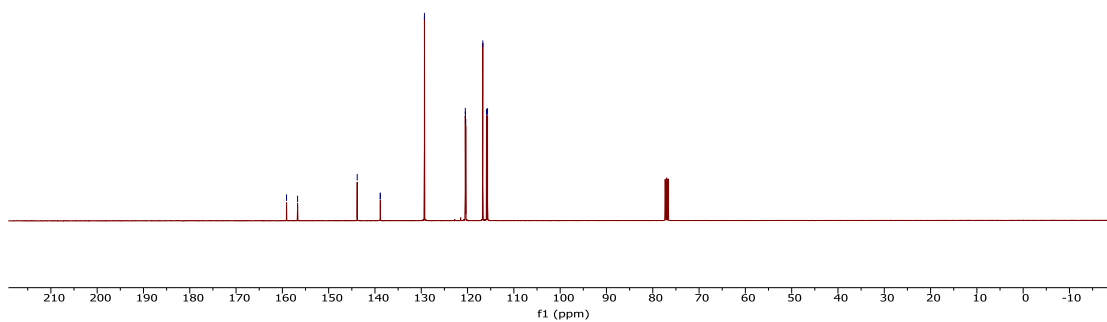

### The $^{19}\text{F}$ -NMR spectrum of 3da

Desktop/3da氟谱  
20221206-1-F

-121.946

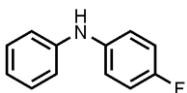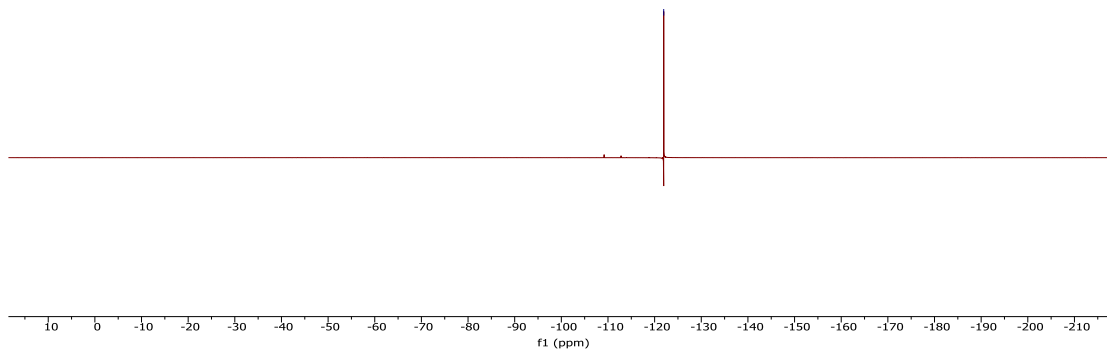



### The $^1\text{H}$ -NMR spectrum of 3ea

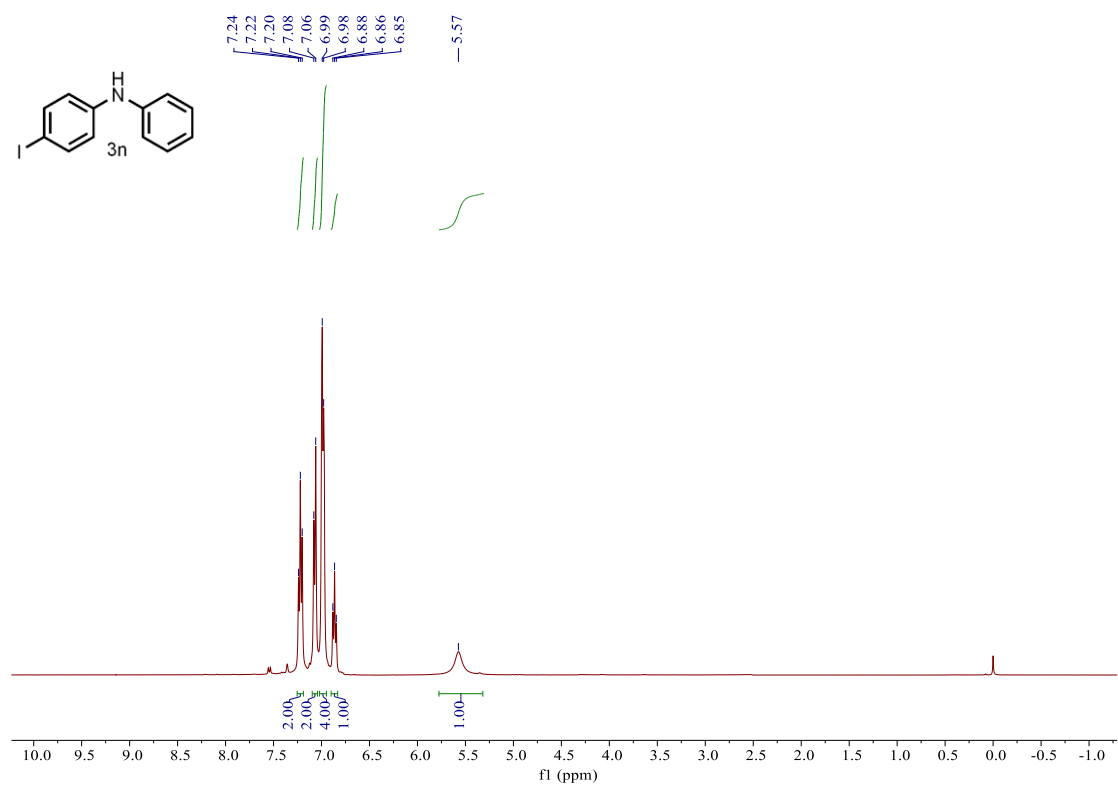

### The $^{13}\text{C}$ -NMR spectrum of 3ea

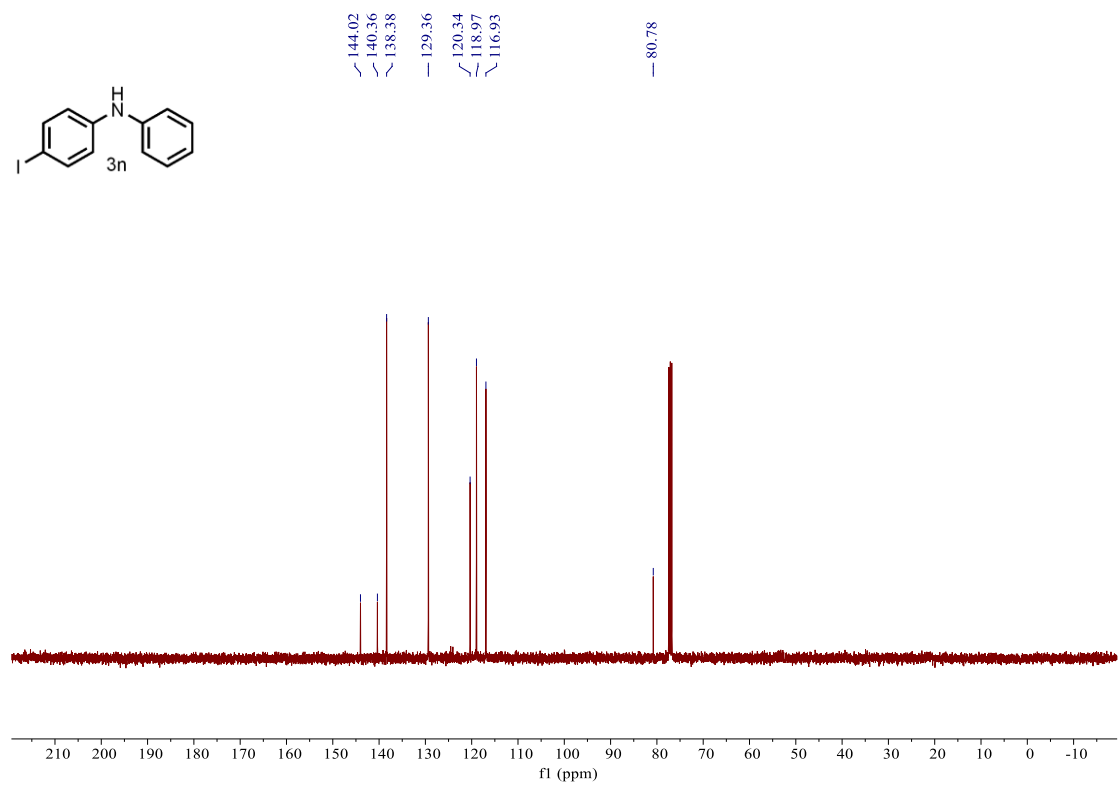

The  $^1\text{H}$ -NMR spectrum of 3fa

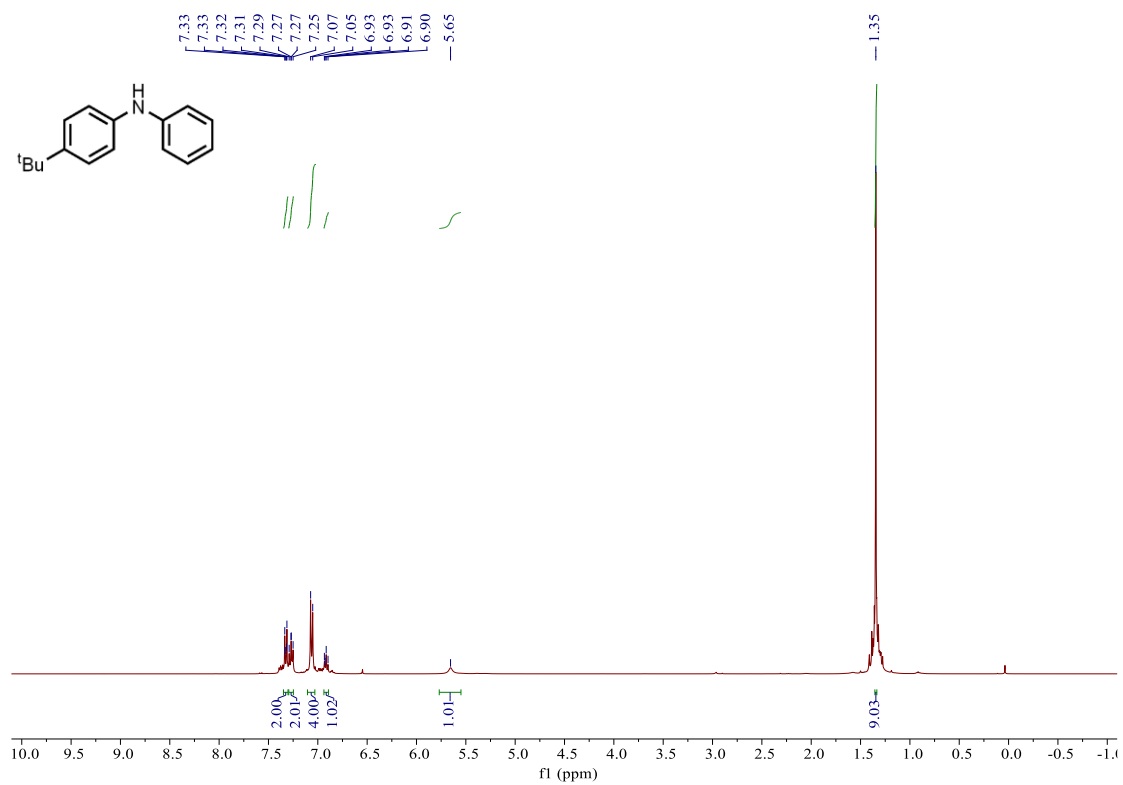

The  $^{13}\text{C}$ -NMR spectrum of 3fa

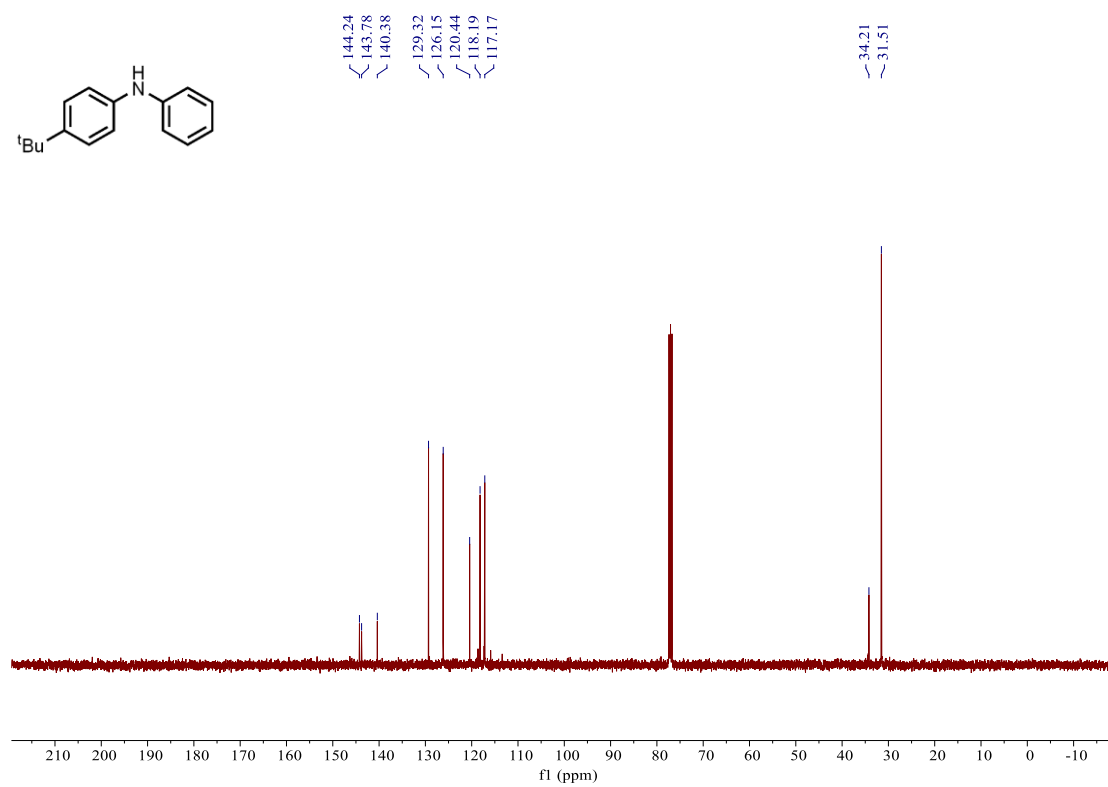

### The $^1\text{H}$ -NMR spectrum of 3ga

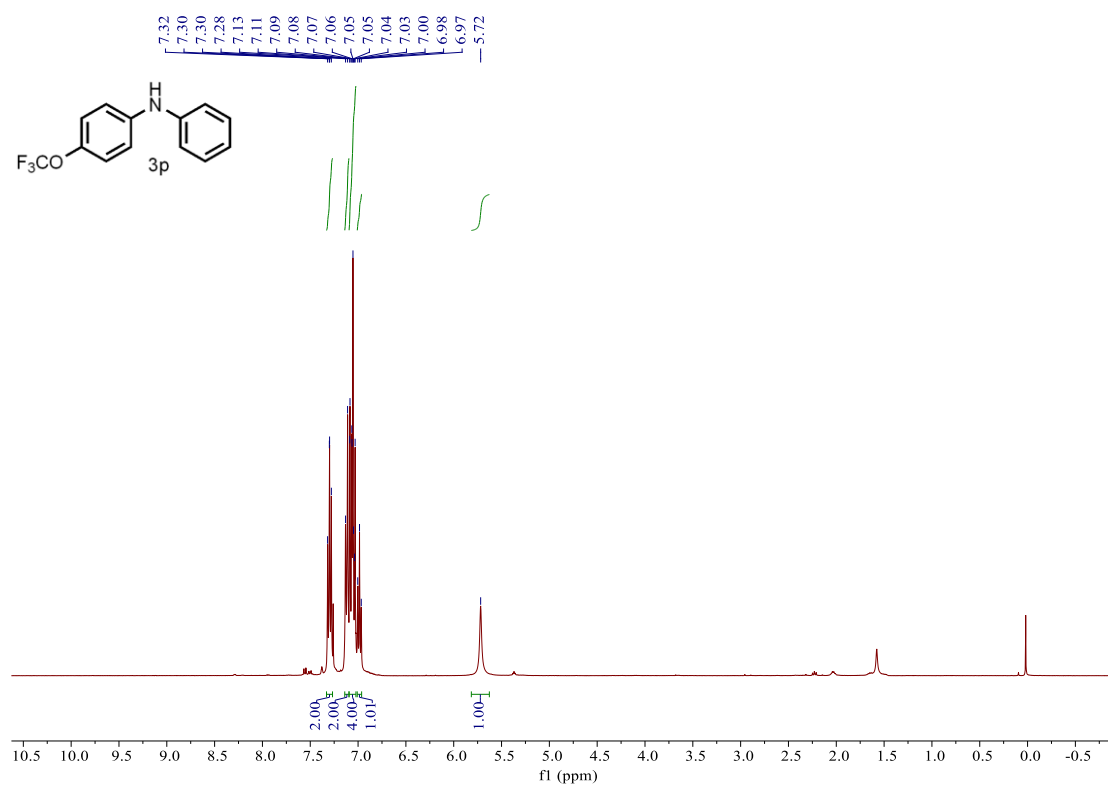

### The $^{13}\text{C}$ -NMR spectrum of 3ga

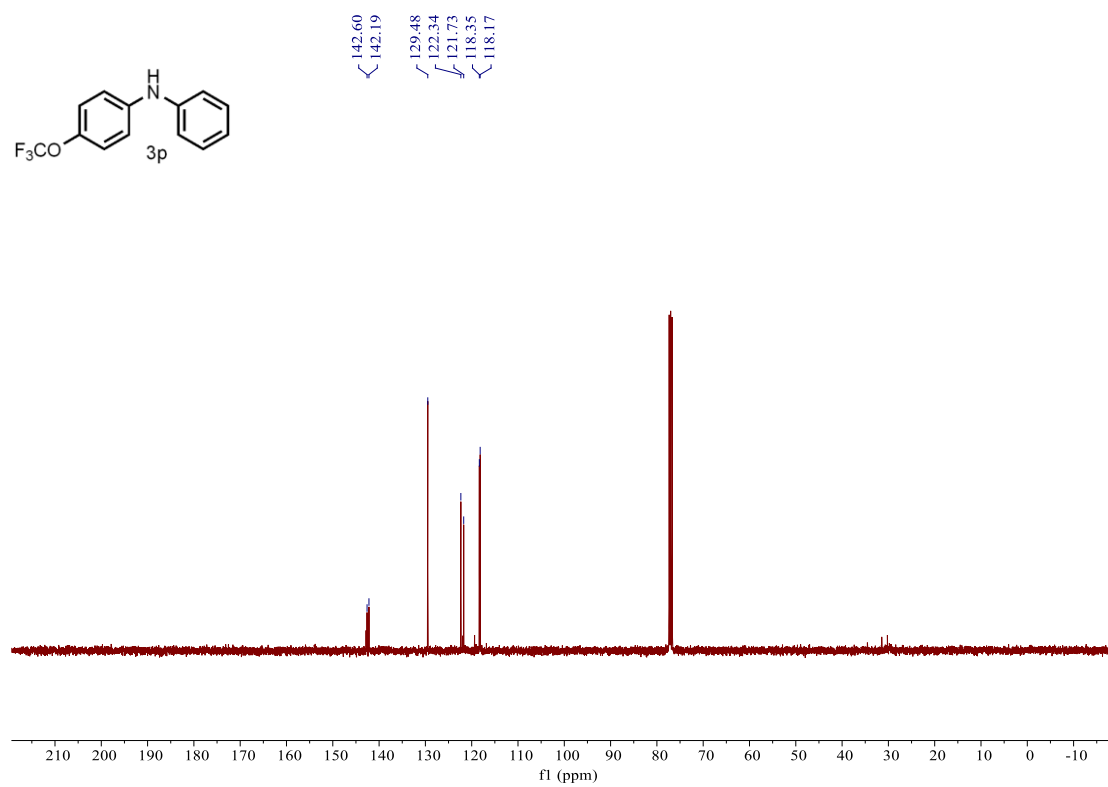

# The $^{19}\text{F}$ -NMR spectrum of 3ga

Desktop/3ga 氟谱  
20221031-2-F

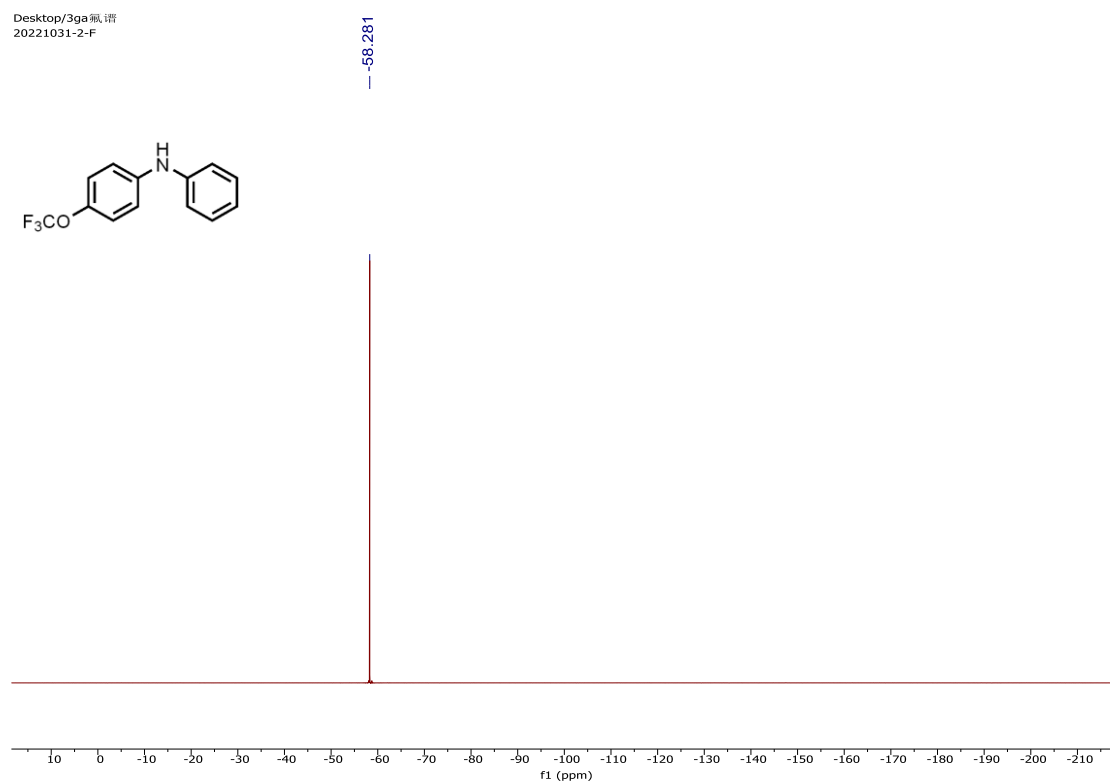

# The $^1\text{H}$ -NMR spectrum of 3ha

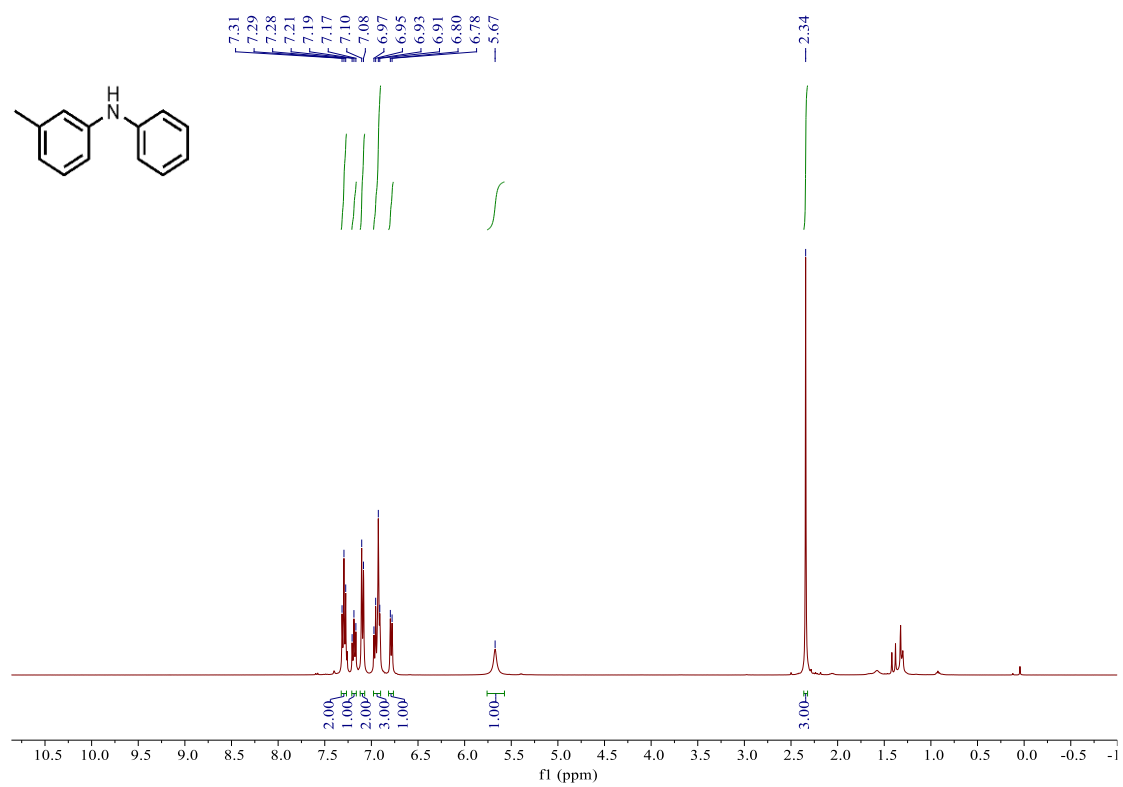

The  $^{13}\text{C}$ -NMR spectrum of 3ha

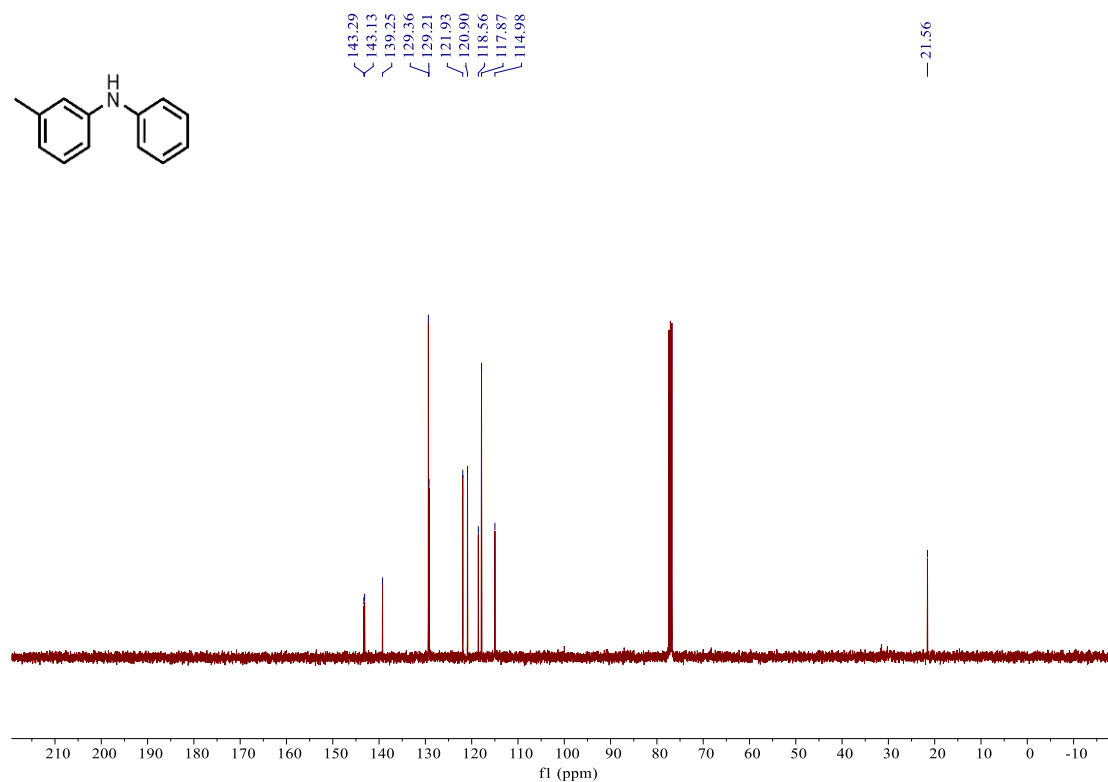

The  $^1\text{H}$ -NMR spectrum of 3ja

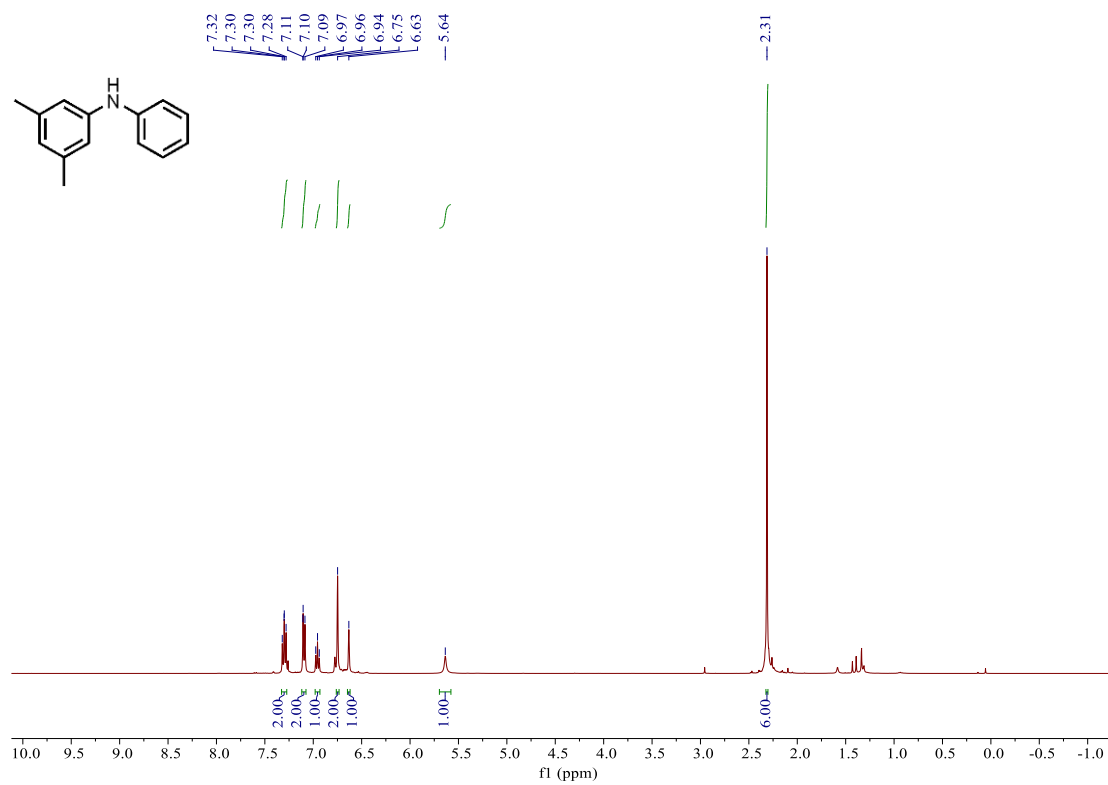

The  $^{13}\text{C}$ -NMR spectrum of 3ja

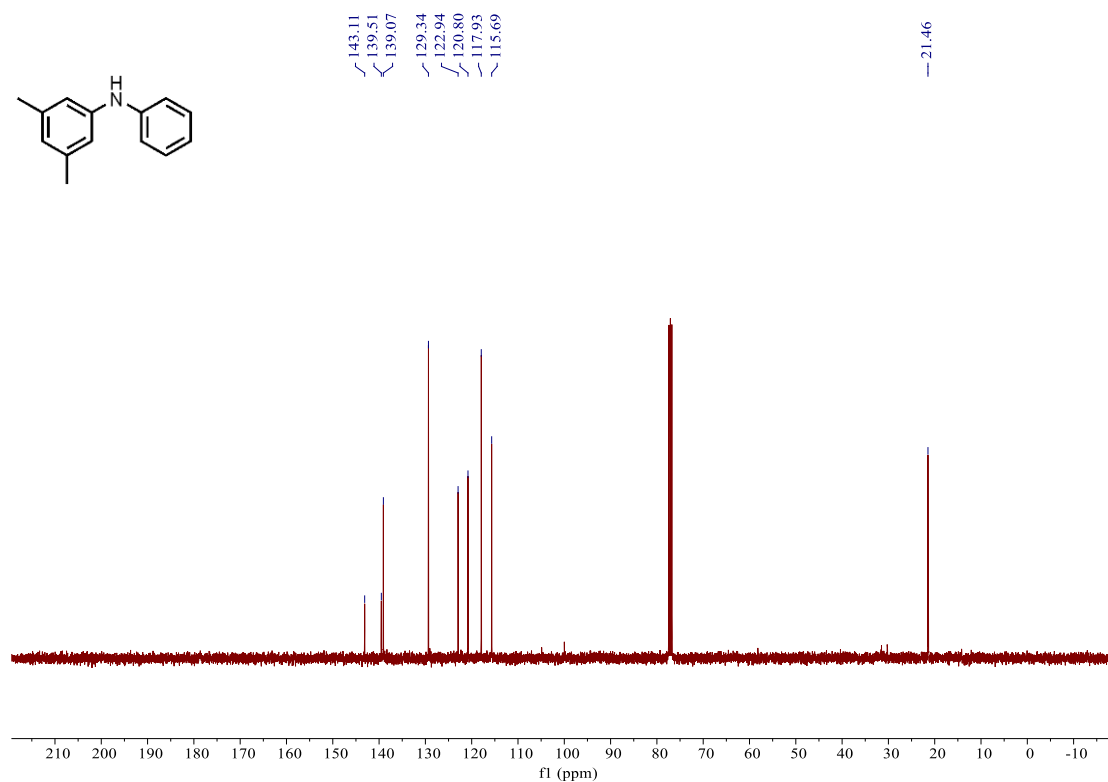

The  $^1\text{H}$ -NMR spectrum of 3ka

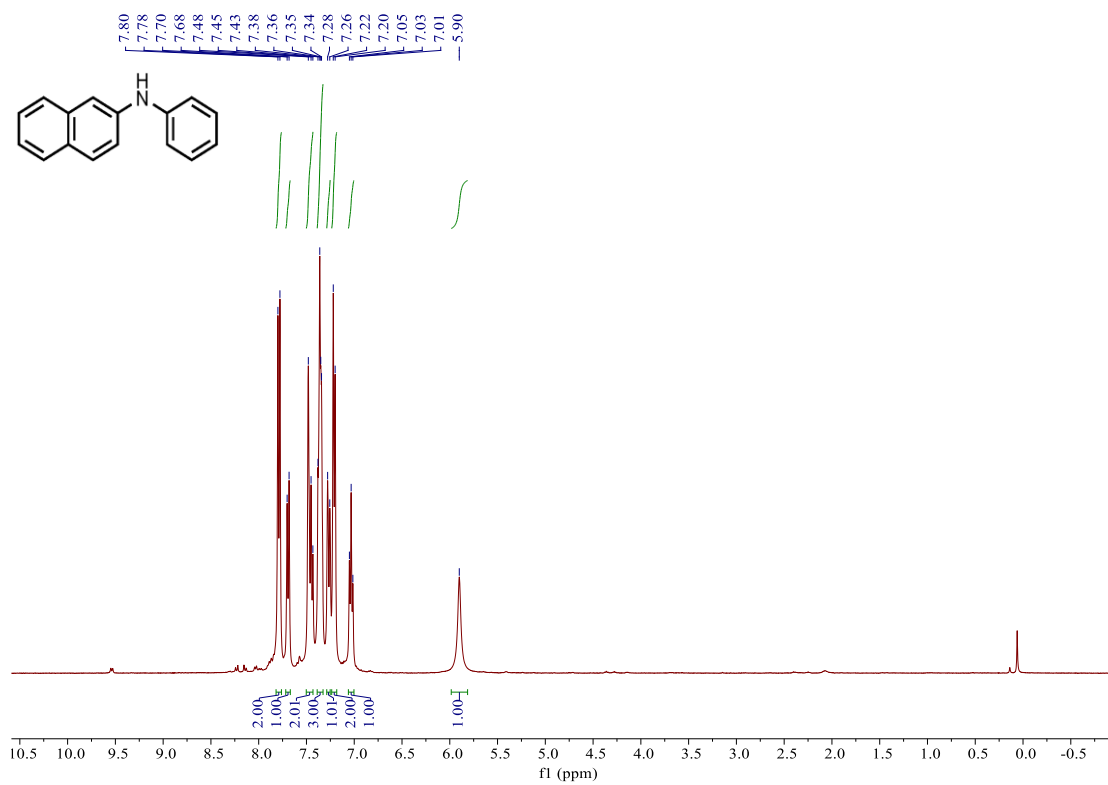

The  $^{13}\text{C}$ -NMR spectrum of 3ka

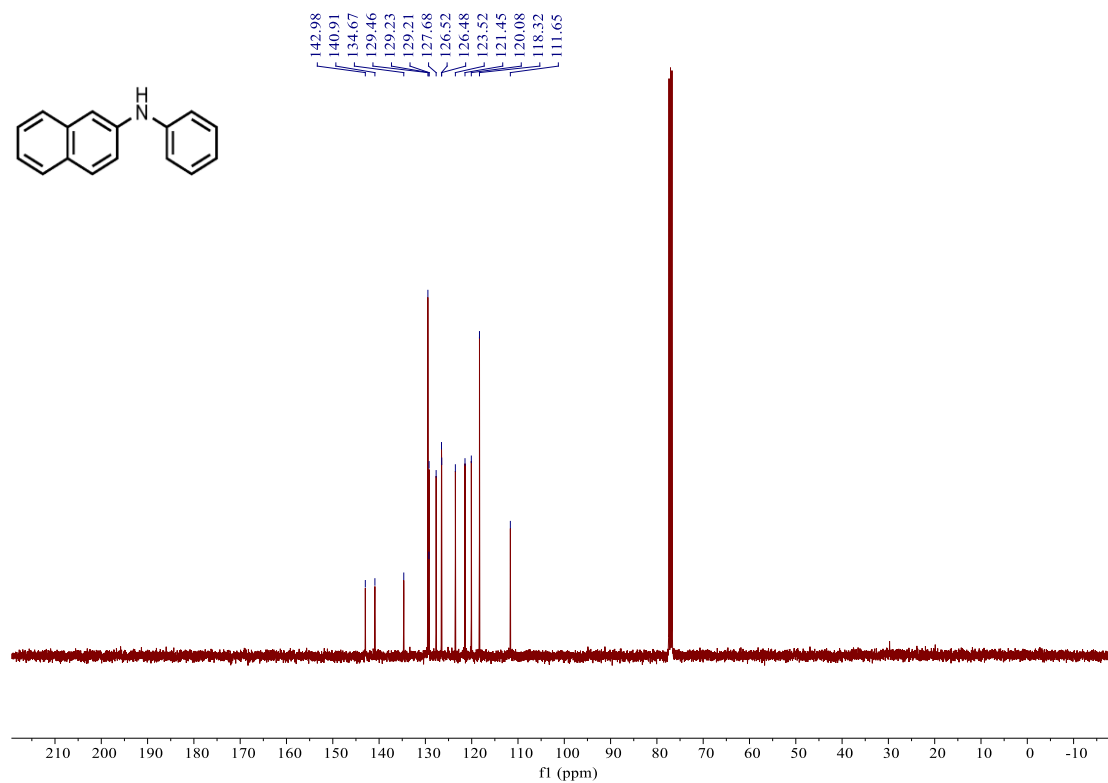

The  $^1\text{H}$ -NMR spectrum of 4a

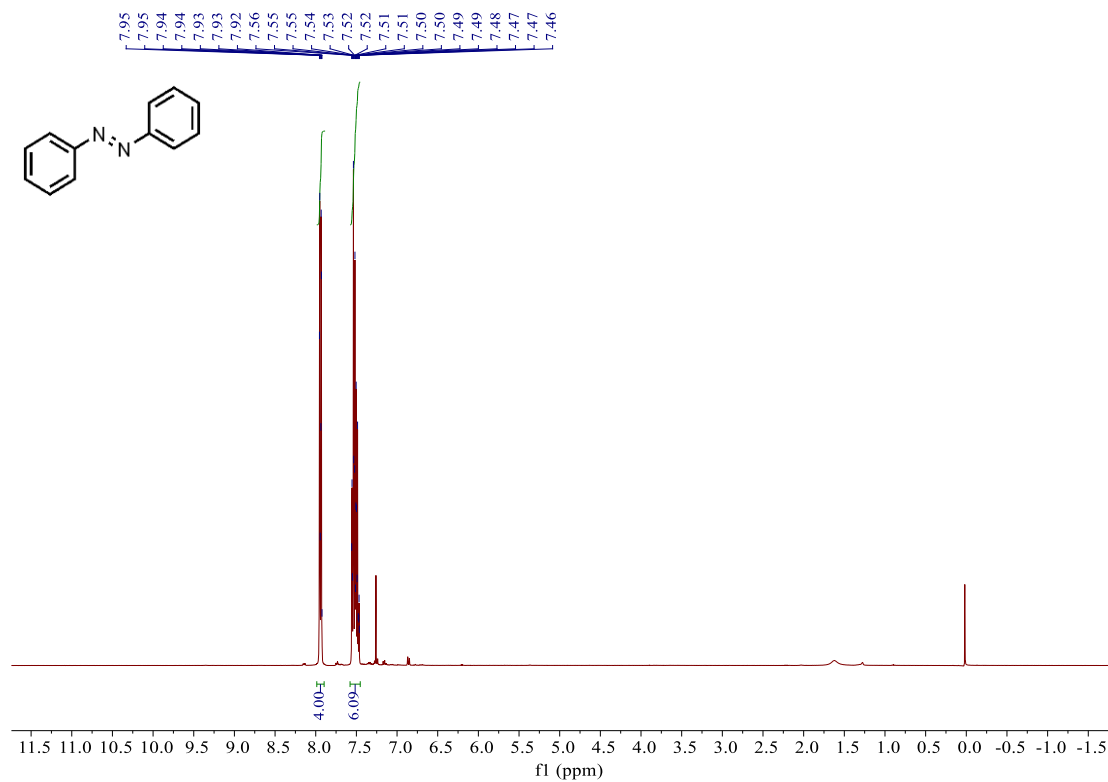

The  $^{13}\text{C}$ -NMR spectrum of 4a

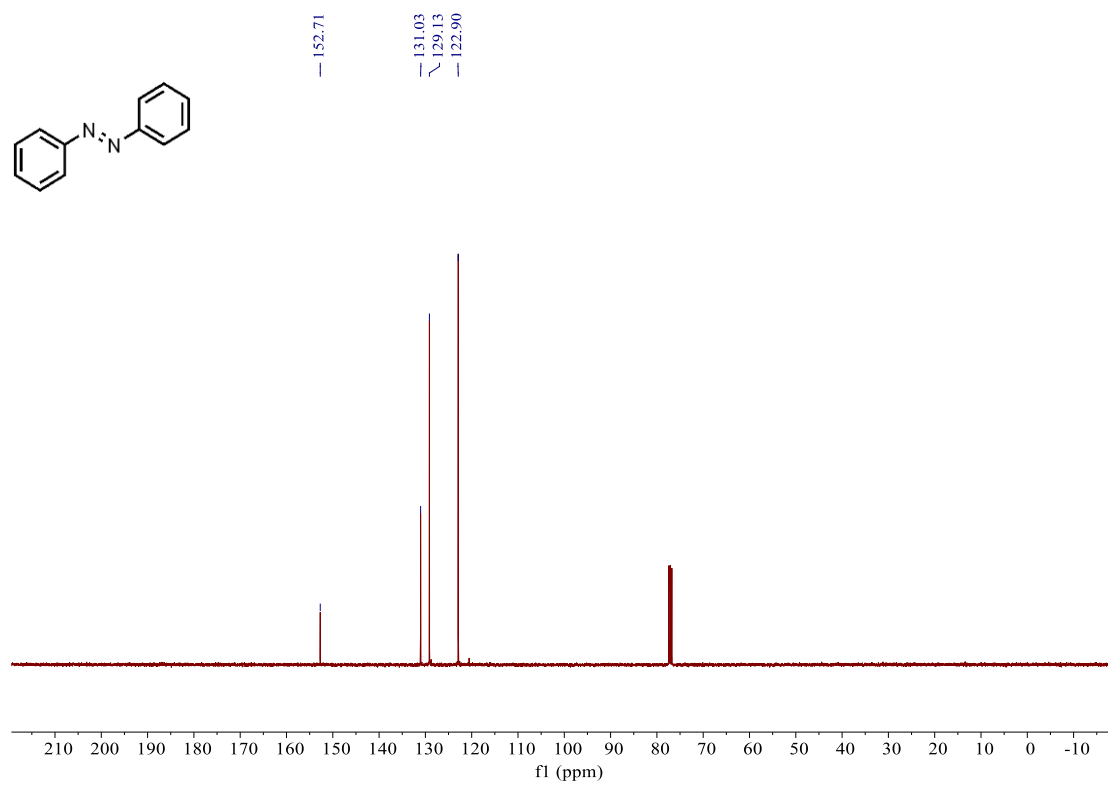

The  $^1\text{H}$ -NMR spectrum of 4b

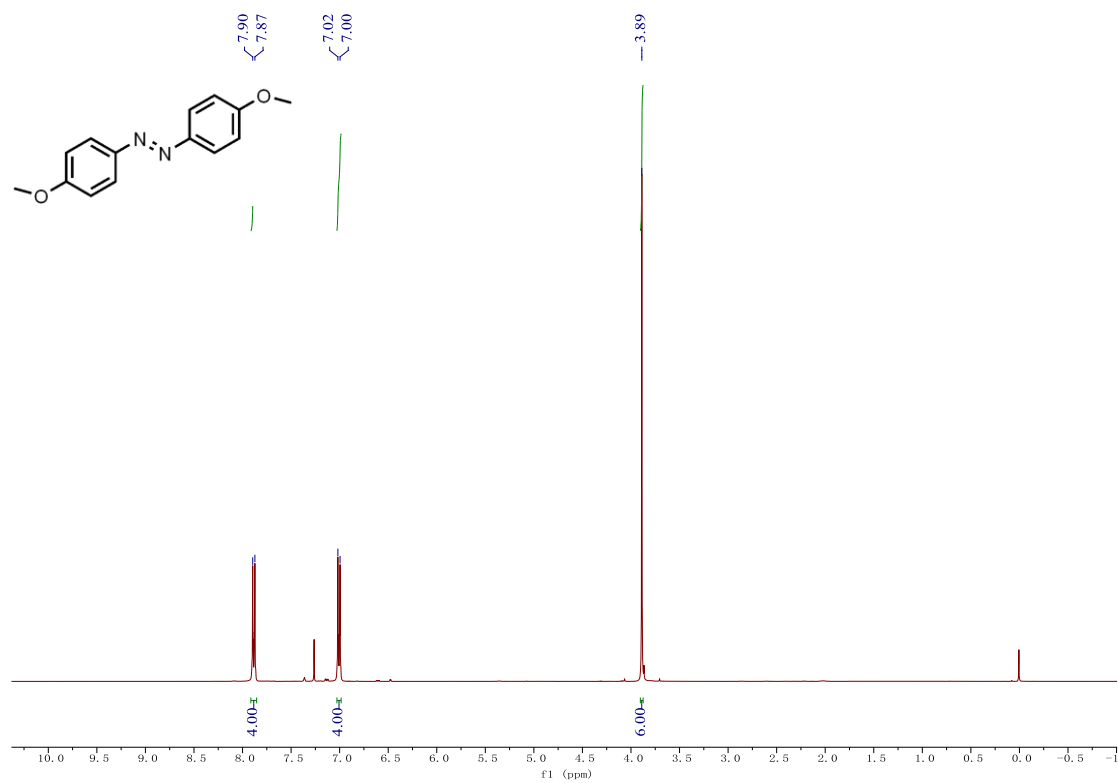



The  $^{13}\text{C}$ -NMR spectrum of 4b

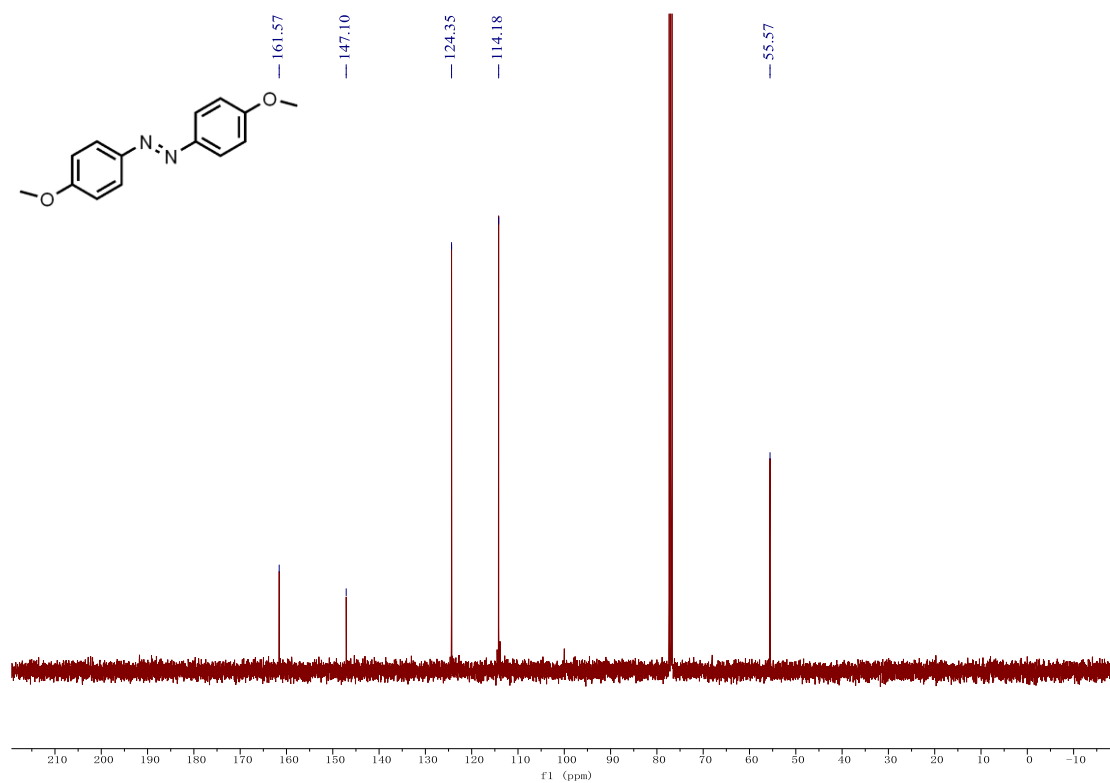

The  $^1\text{H}$ -NMR spectrum of 4c

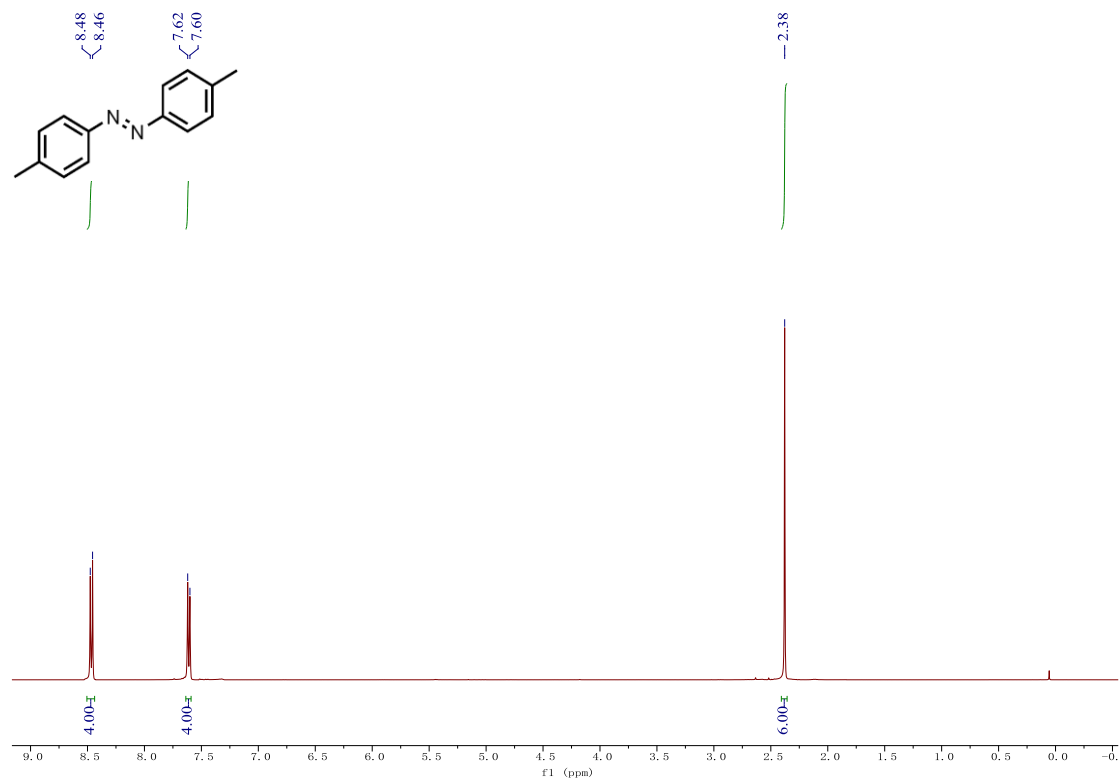

The  $^{13}\text{C}$ -NMR spectrum of 4c

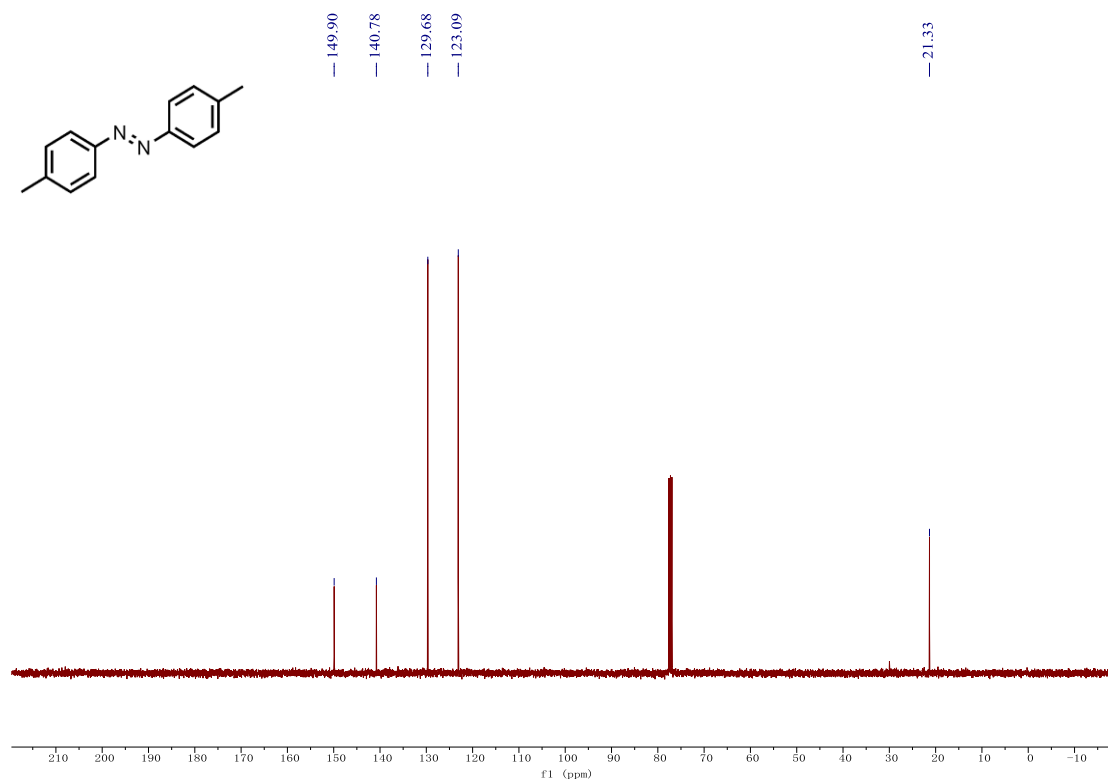

The  $^1\text{H}$ -NMR spectrum of 4d

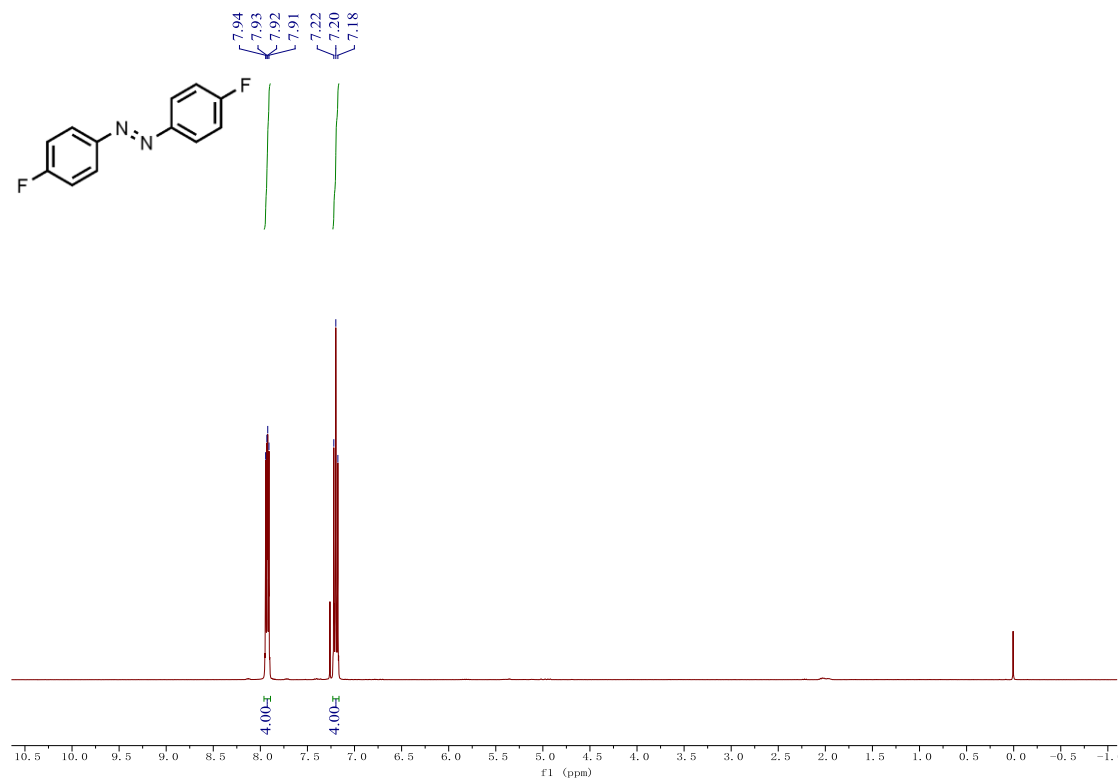

### The $^{13}\text{C}$ -NMR spectrum of 4d

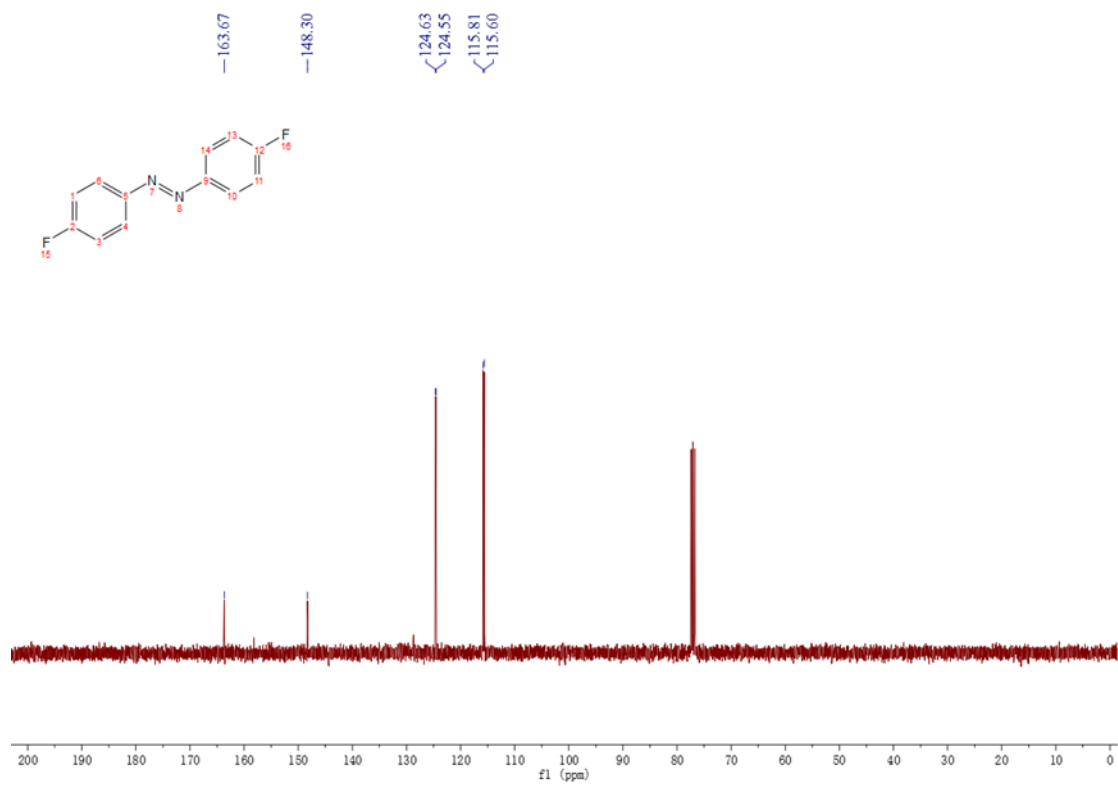

### The $^{19}\text{F}$ -NMR spectrum of 4e

Desktop/4d 谱图  
20221031-1-F

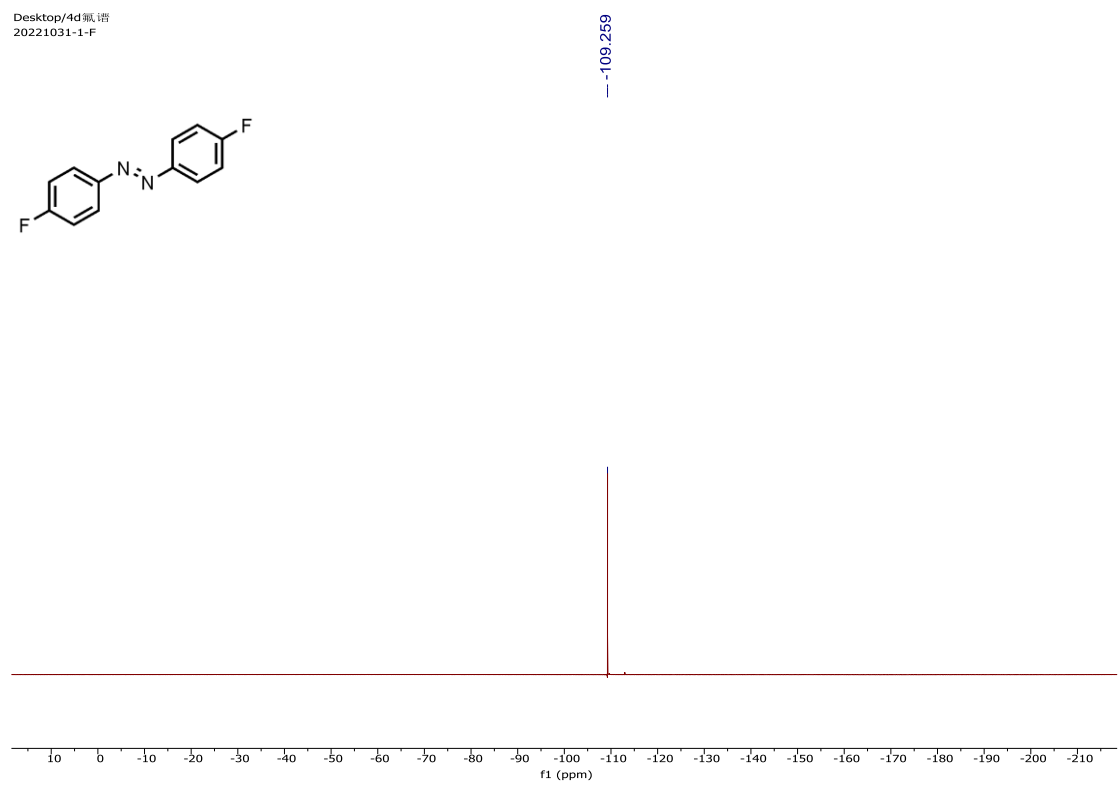

The  $^1\text{H}$ -NMR spectrum of 4e

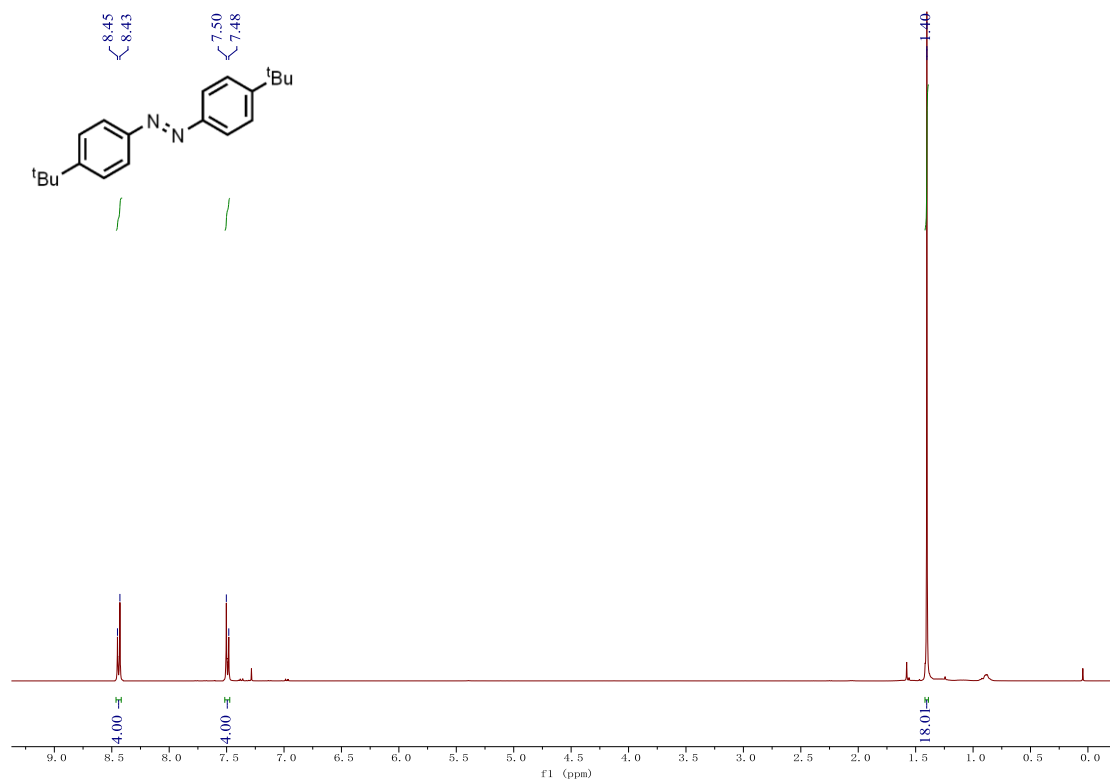

The  $^{13}\text{C}$ -NMR spectrum of 4e

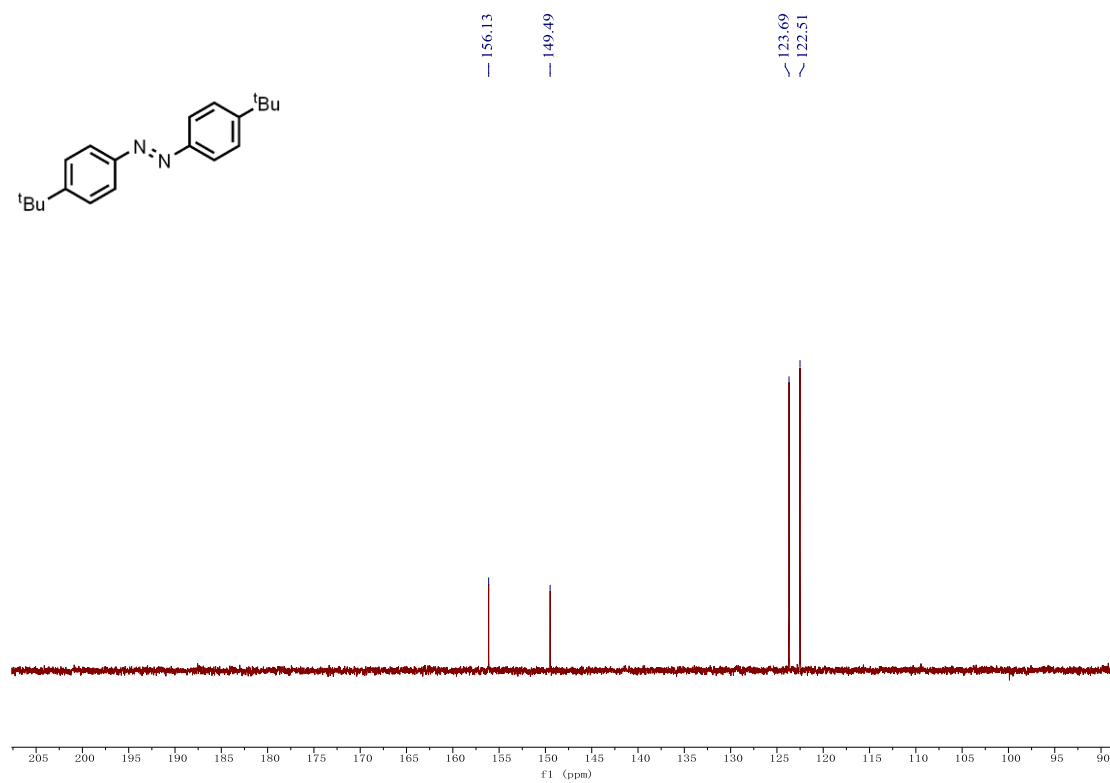

The  $^1\text{H}$ -NMR spectrum of 4f

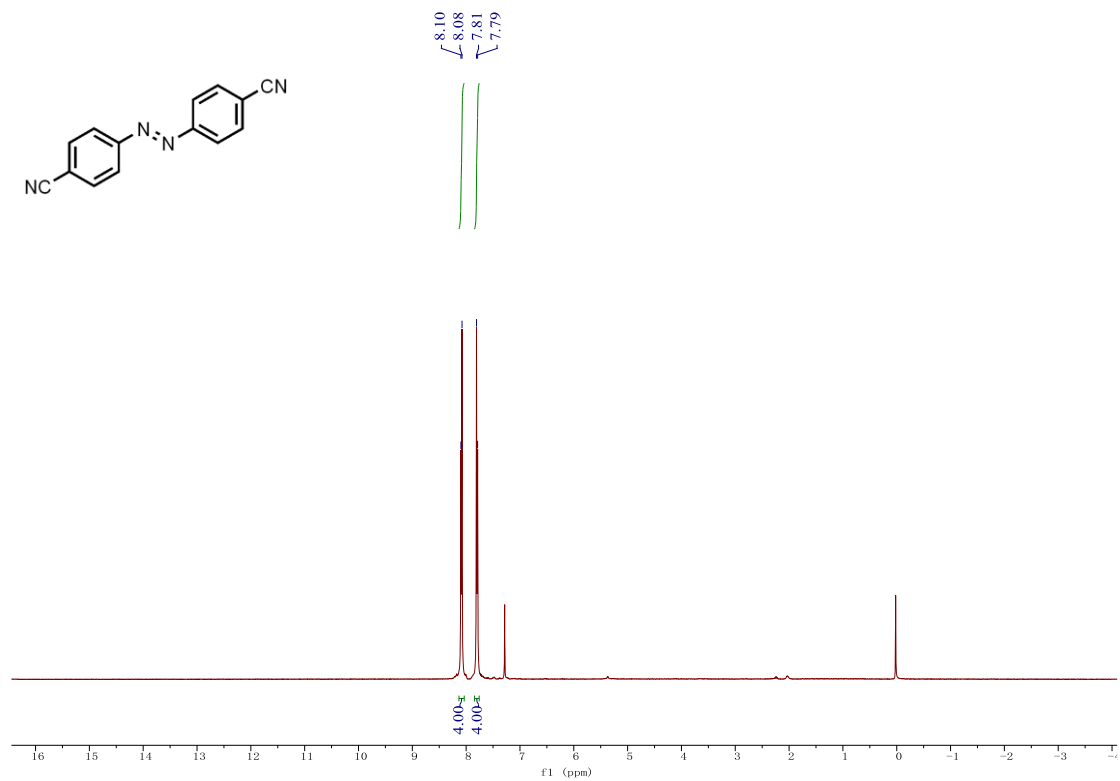

The  $^{13}\text{C}$ -NMR spectrum of 4f

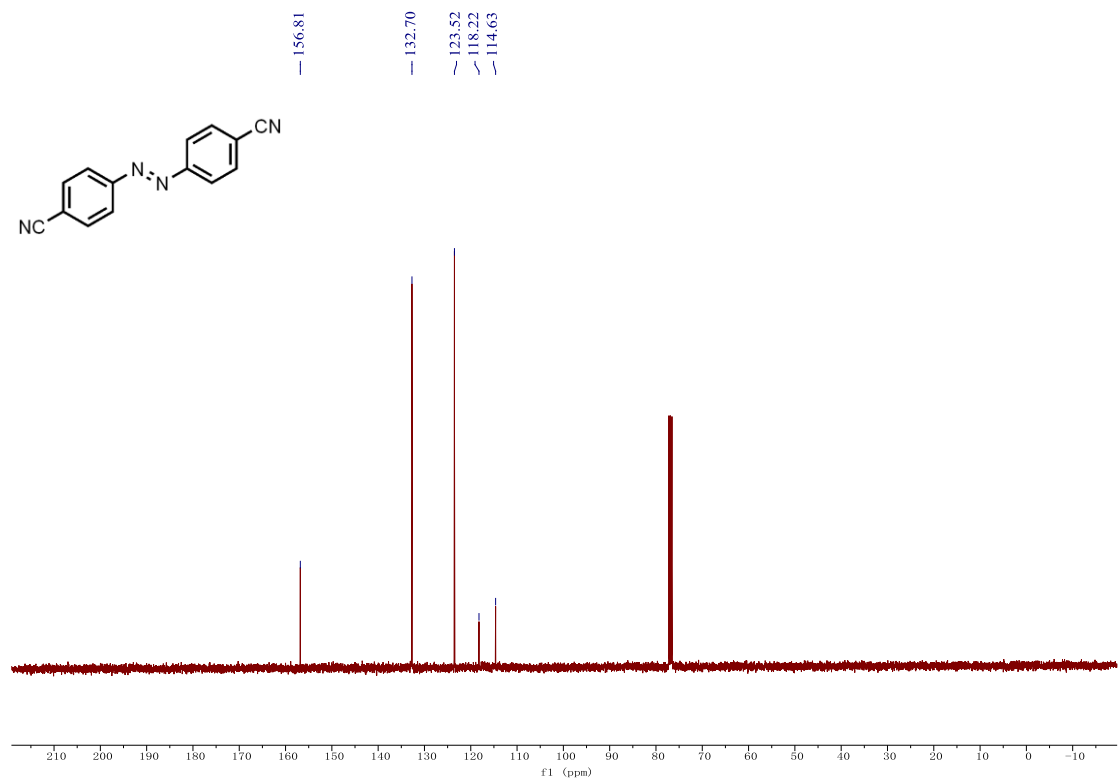

The  $^1\text{H}$ -NMR spectrum of 4g

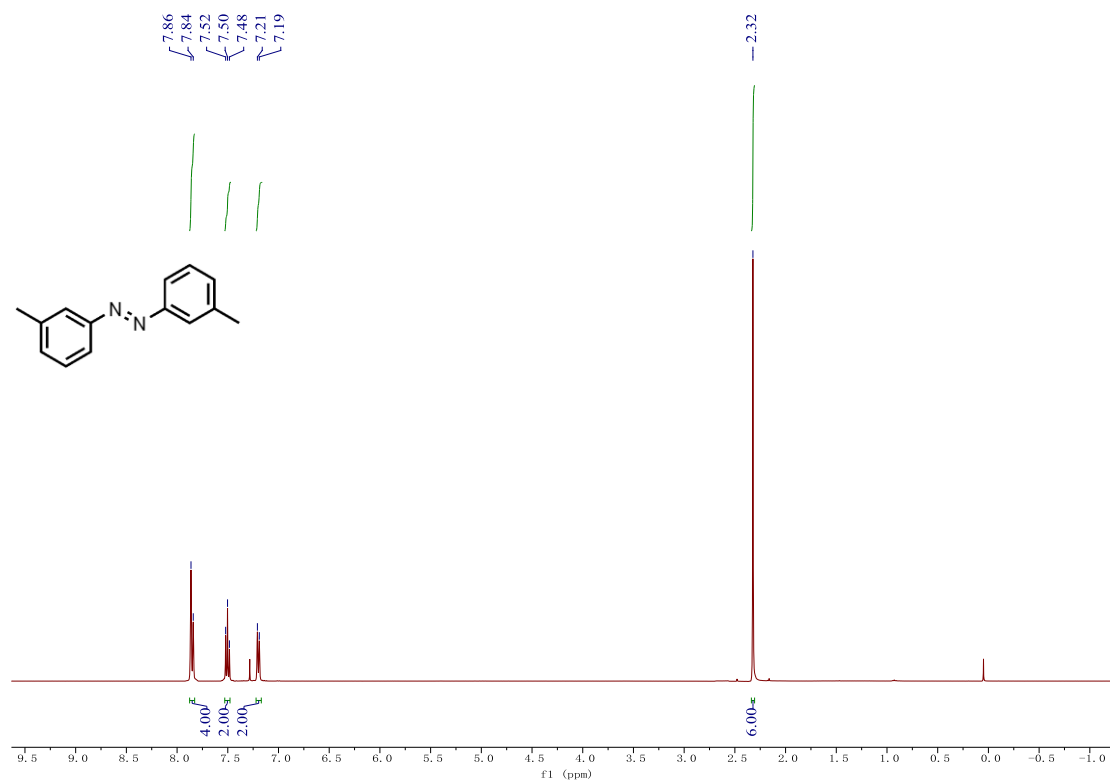

The  $^{13}\text{C}$ -NMR spectrum of 4g

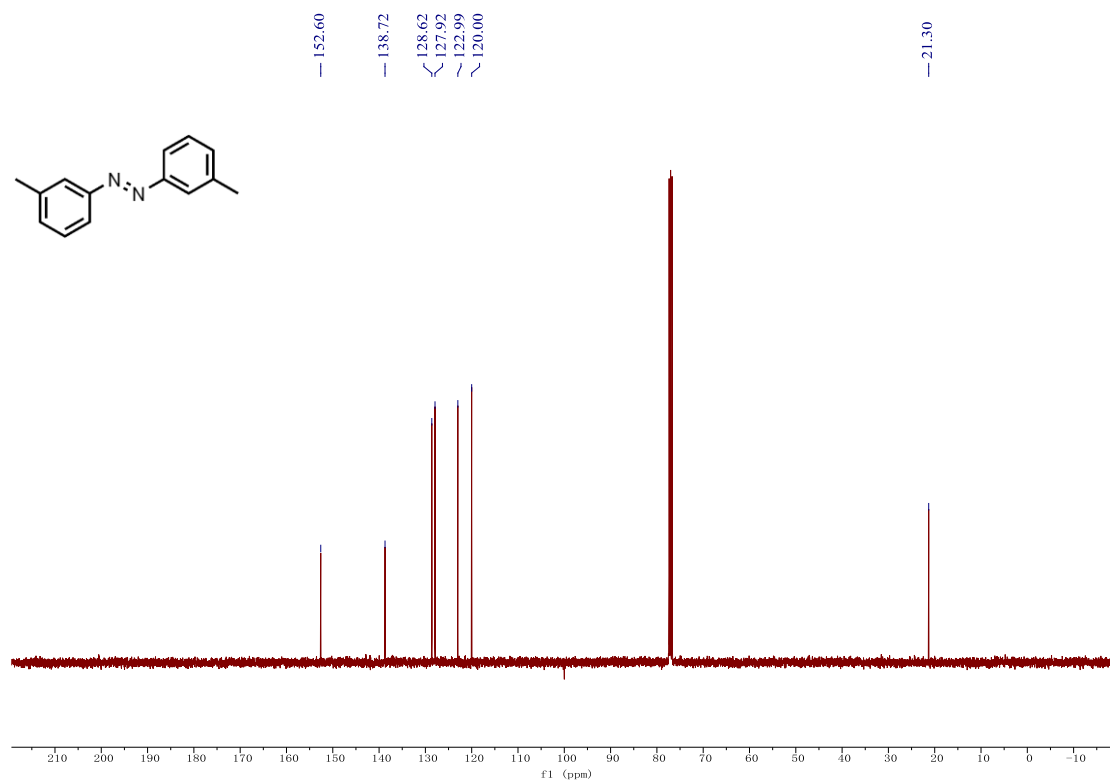

The  $^1\text{H}$ -NMR spectrum of 4h

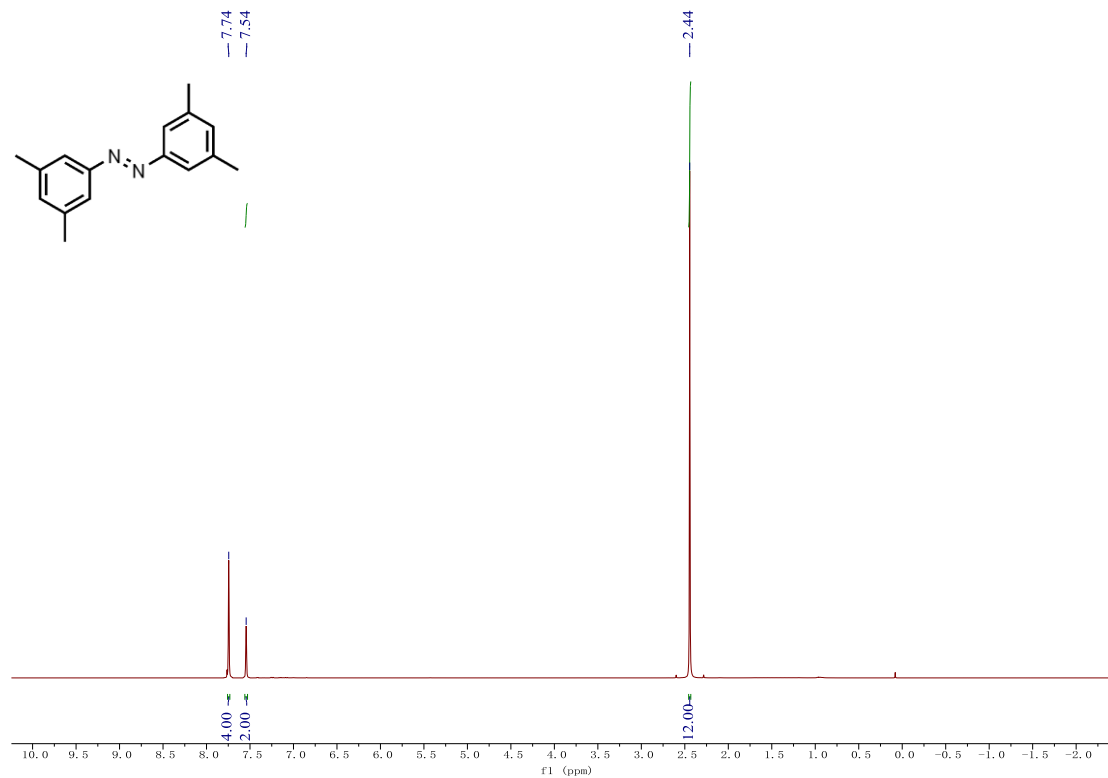

The  $^{13}\text{C}$ -NMR spectrum of 4g

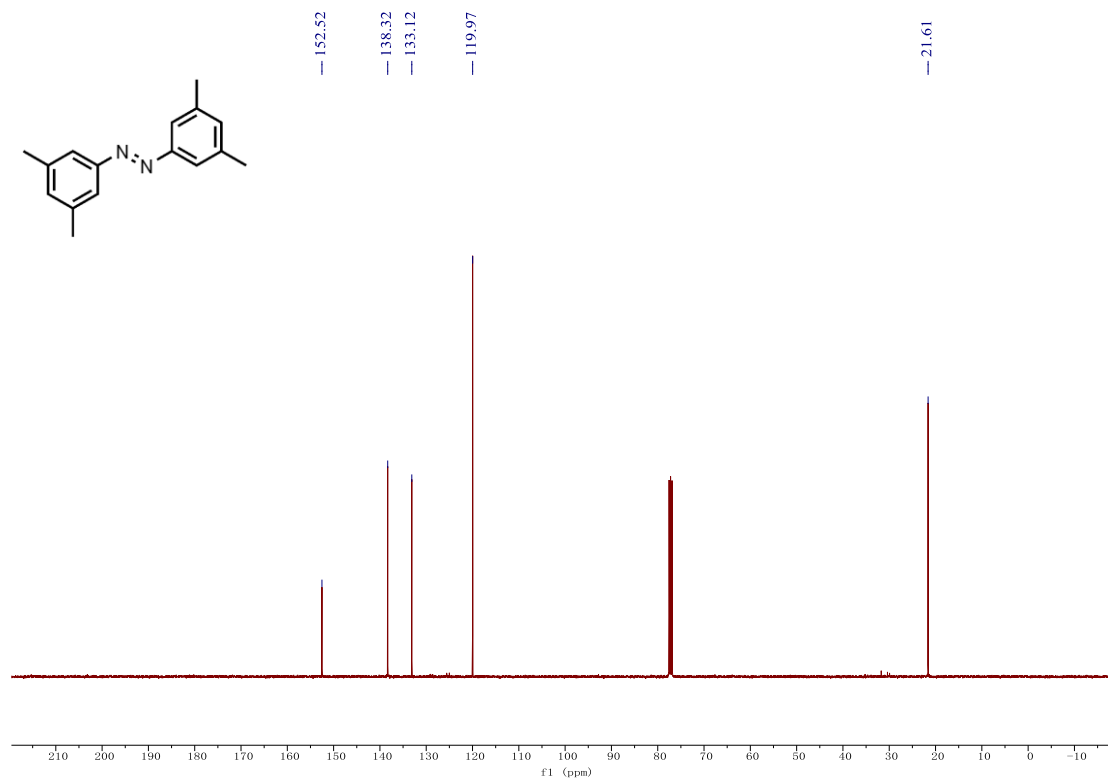

The  $^1\text{H}$ -NMR spectrum of 4j

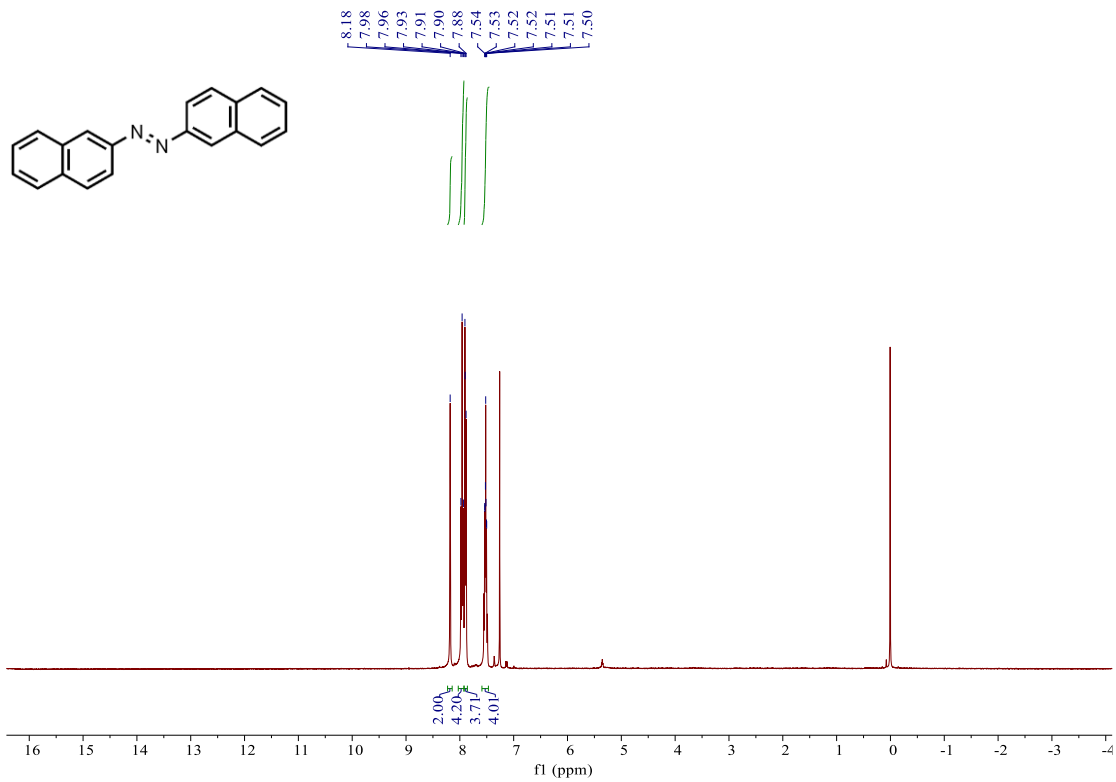

The  $^{13}\text{C}$ -NMR spectrum of 4j

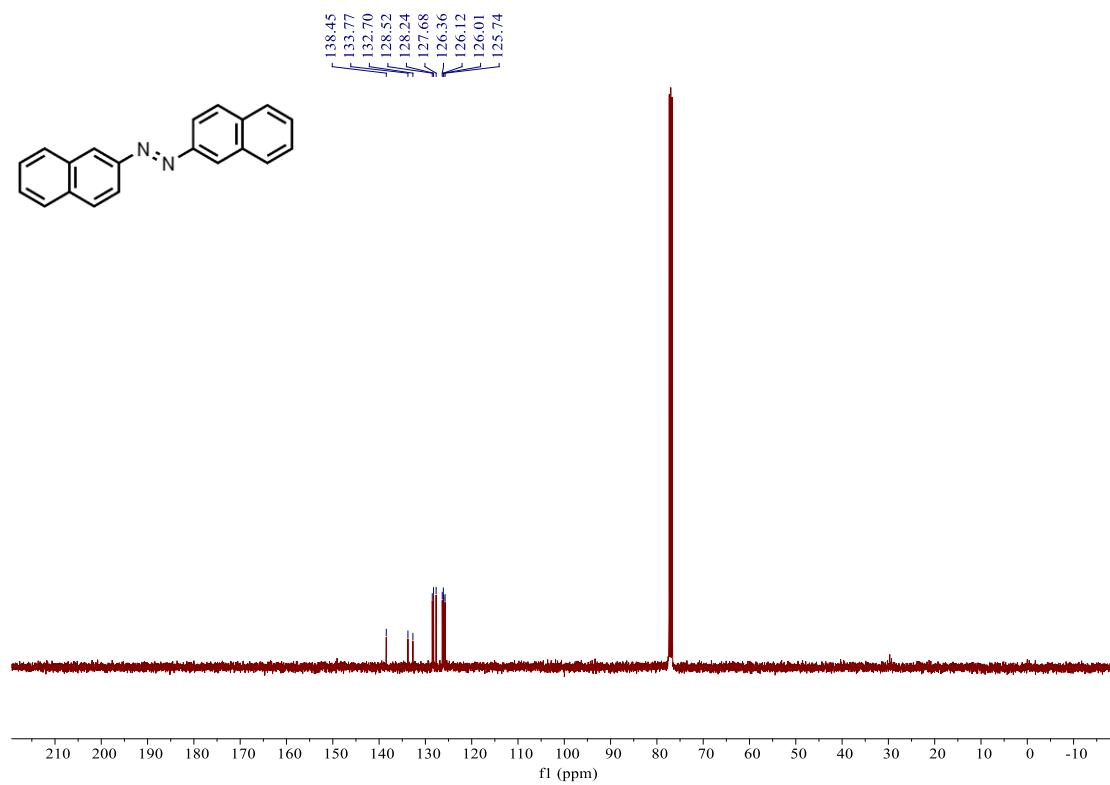



The  $^1\text{H-NMR}$  spectrum of  $L_1$

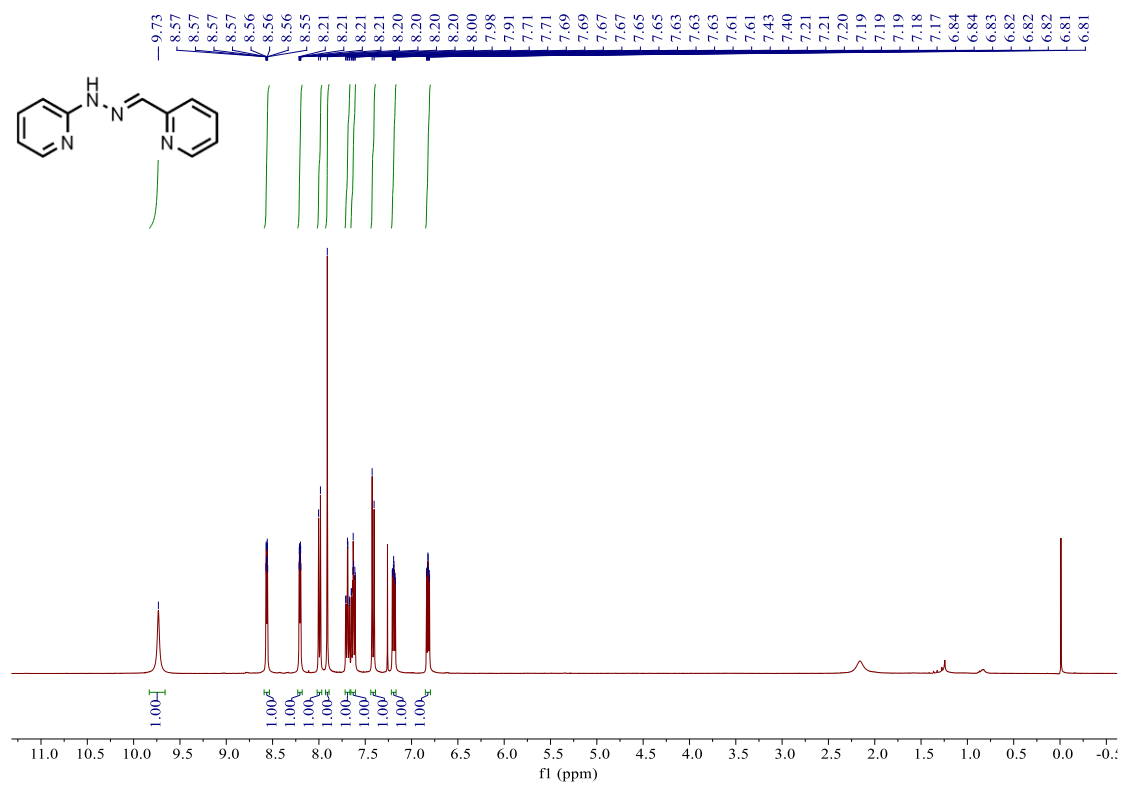

The  $^{13}\text{C-NMR}$  spectrum of  $L_1$

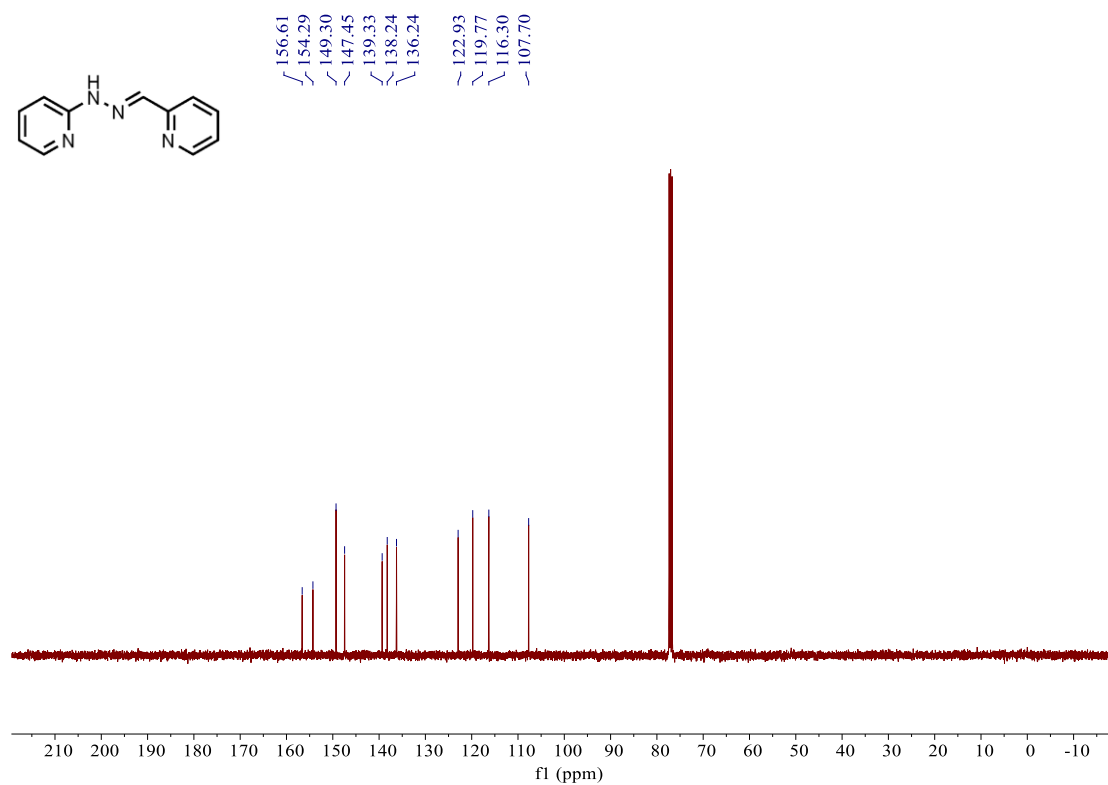

The  $^1\text{H}$ -NMR spectrum of  $\text{L}_2$

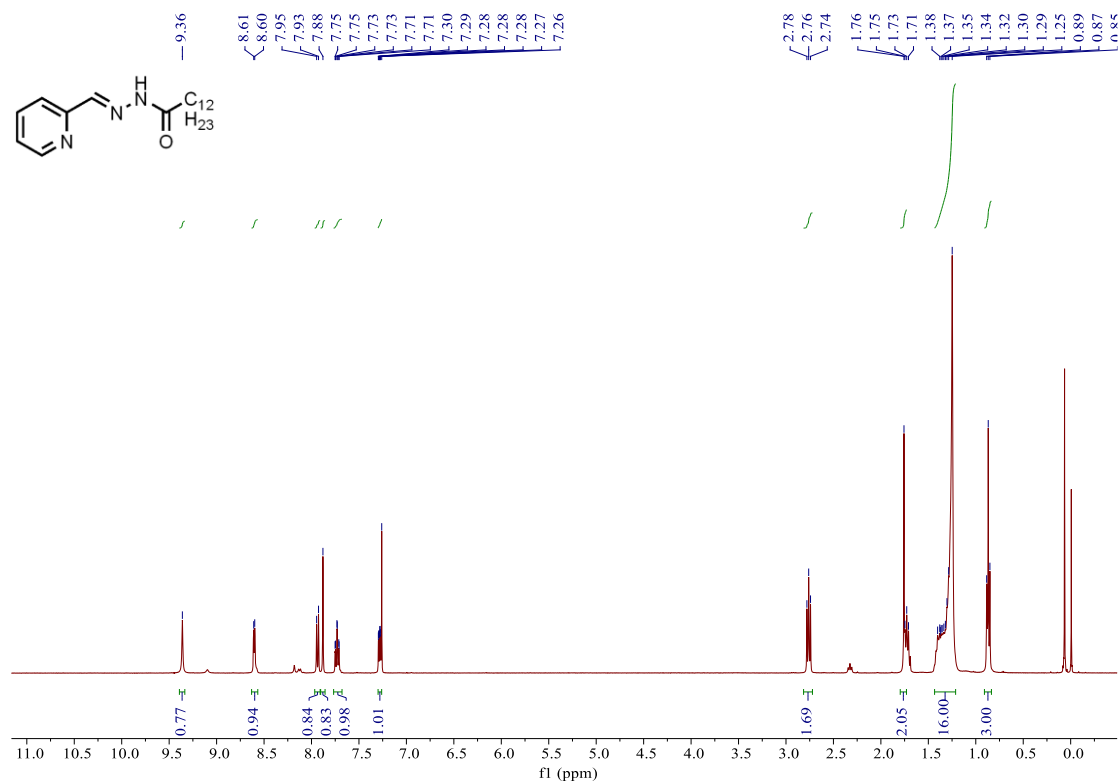

The  $^{13}\text{C}$ -NMR spectrum of  $\text{L}_2$

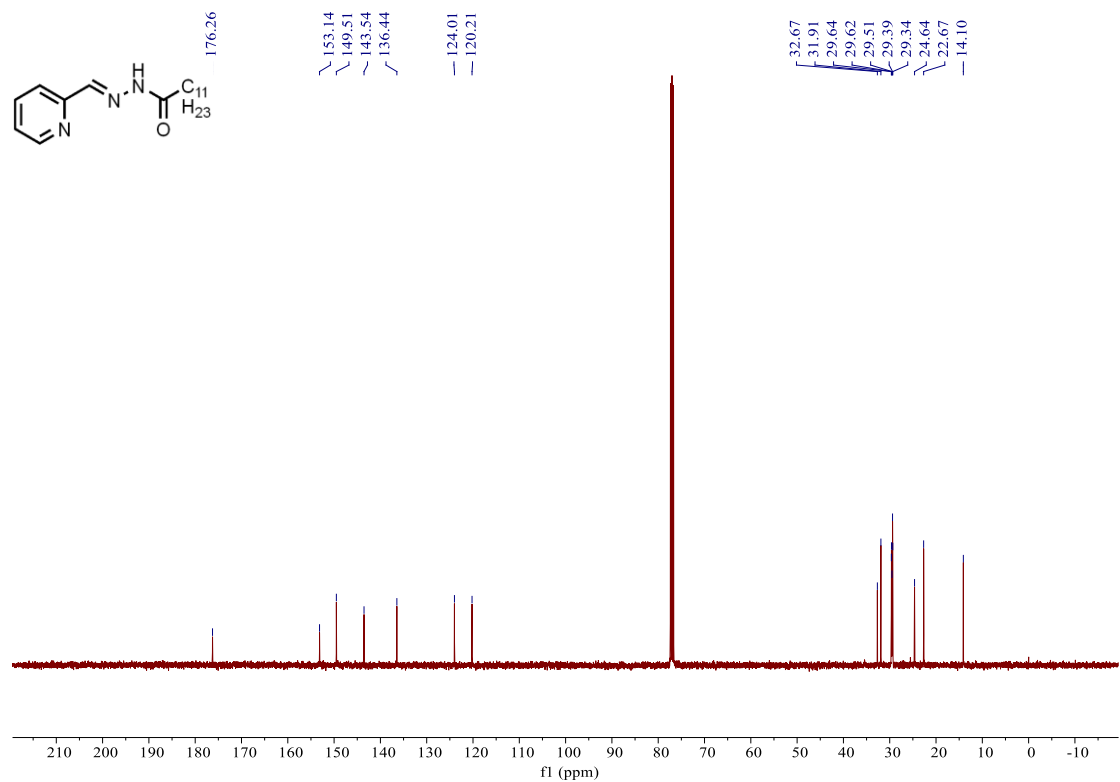

The <sup>1</sup>H-NMR spectrum of L<sub>3</sub>

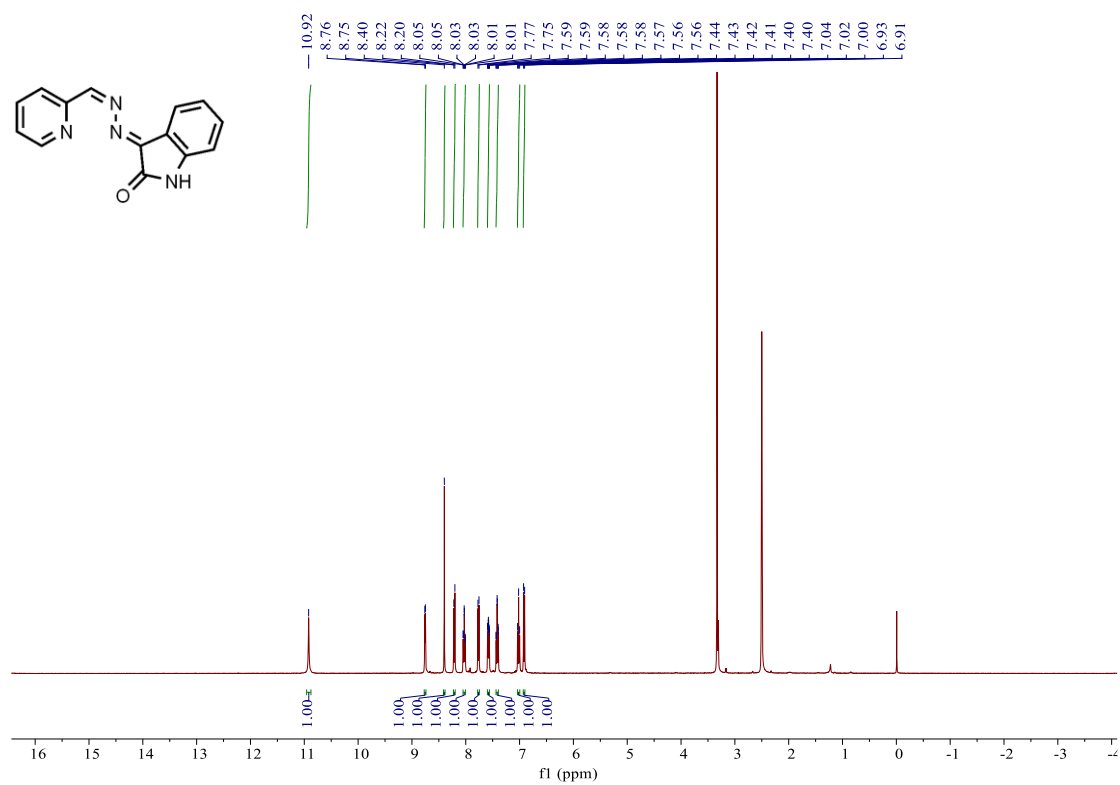

The <sup>13</sup>C-NMR spectrum of L<sub>3</sub>

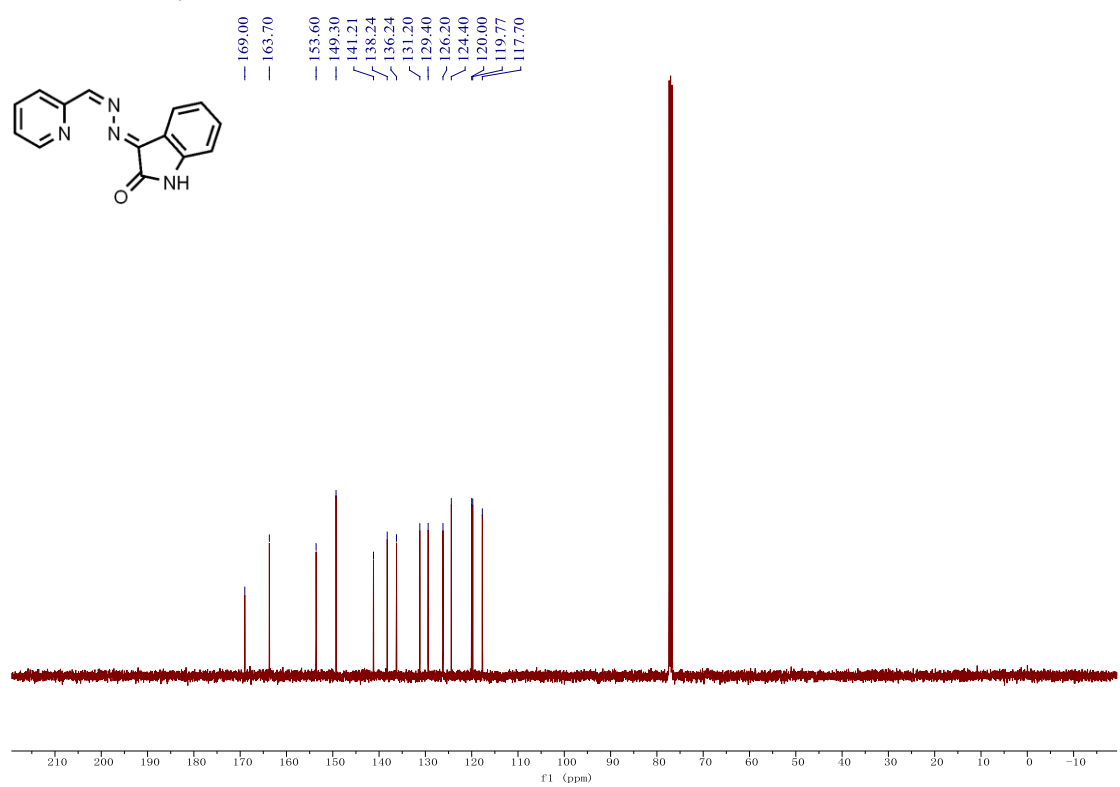

Supplement: d2ob02092k1.pdf [file d2ob02092k1.pdf]
